# Supplementary material for: Regulating Surface and Local Chemistry in High Na-content P2-type Cathode to Achieve Ultrahigh Power and Low Temperature Sodium Storage
Source: Research Square preprint supplement (doi:10.21203/rs.3.rs-820608/v1), 2021-09-02
Supplement: Supplementary file 1 [file b79a758a8d5a6874ffdbb732.docx]

**Supplementary Information**

**Regulating Surface and Local Chemistry in High Na-content P2-type Cathode to Achieve Ultrahigh Power and Low Temperature Sodium Storage**


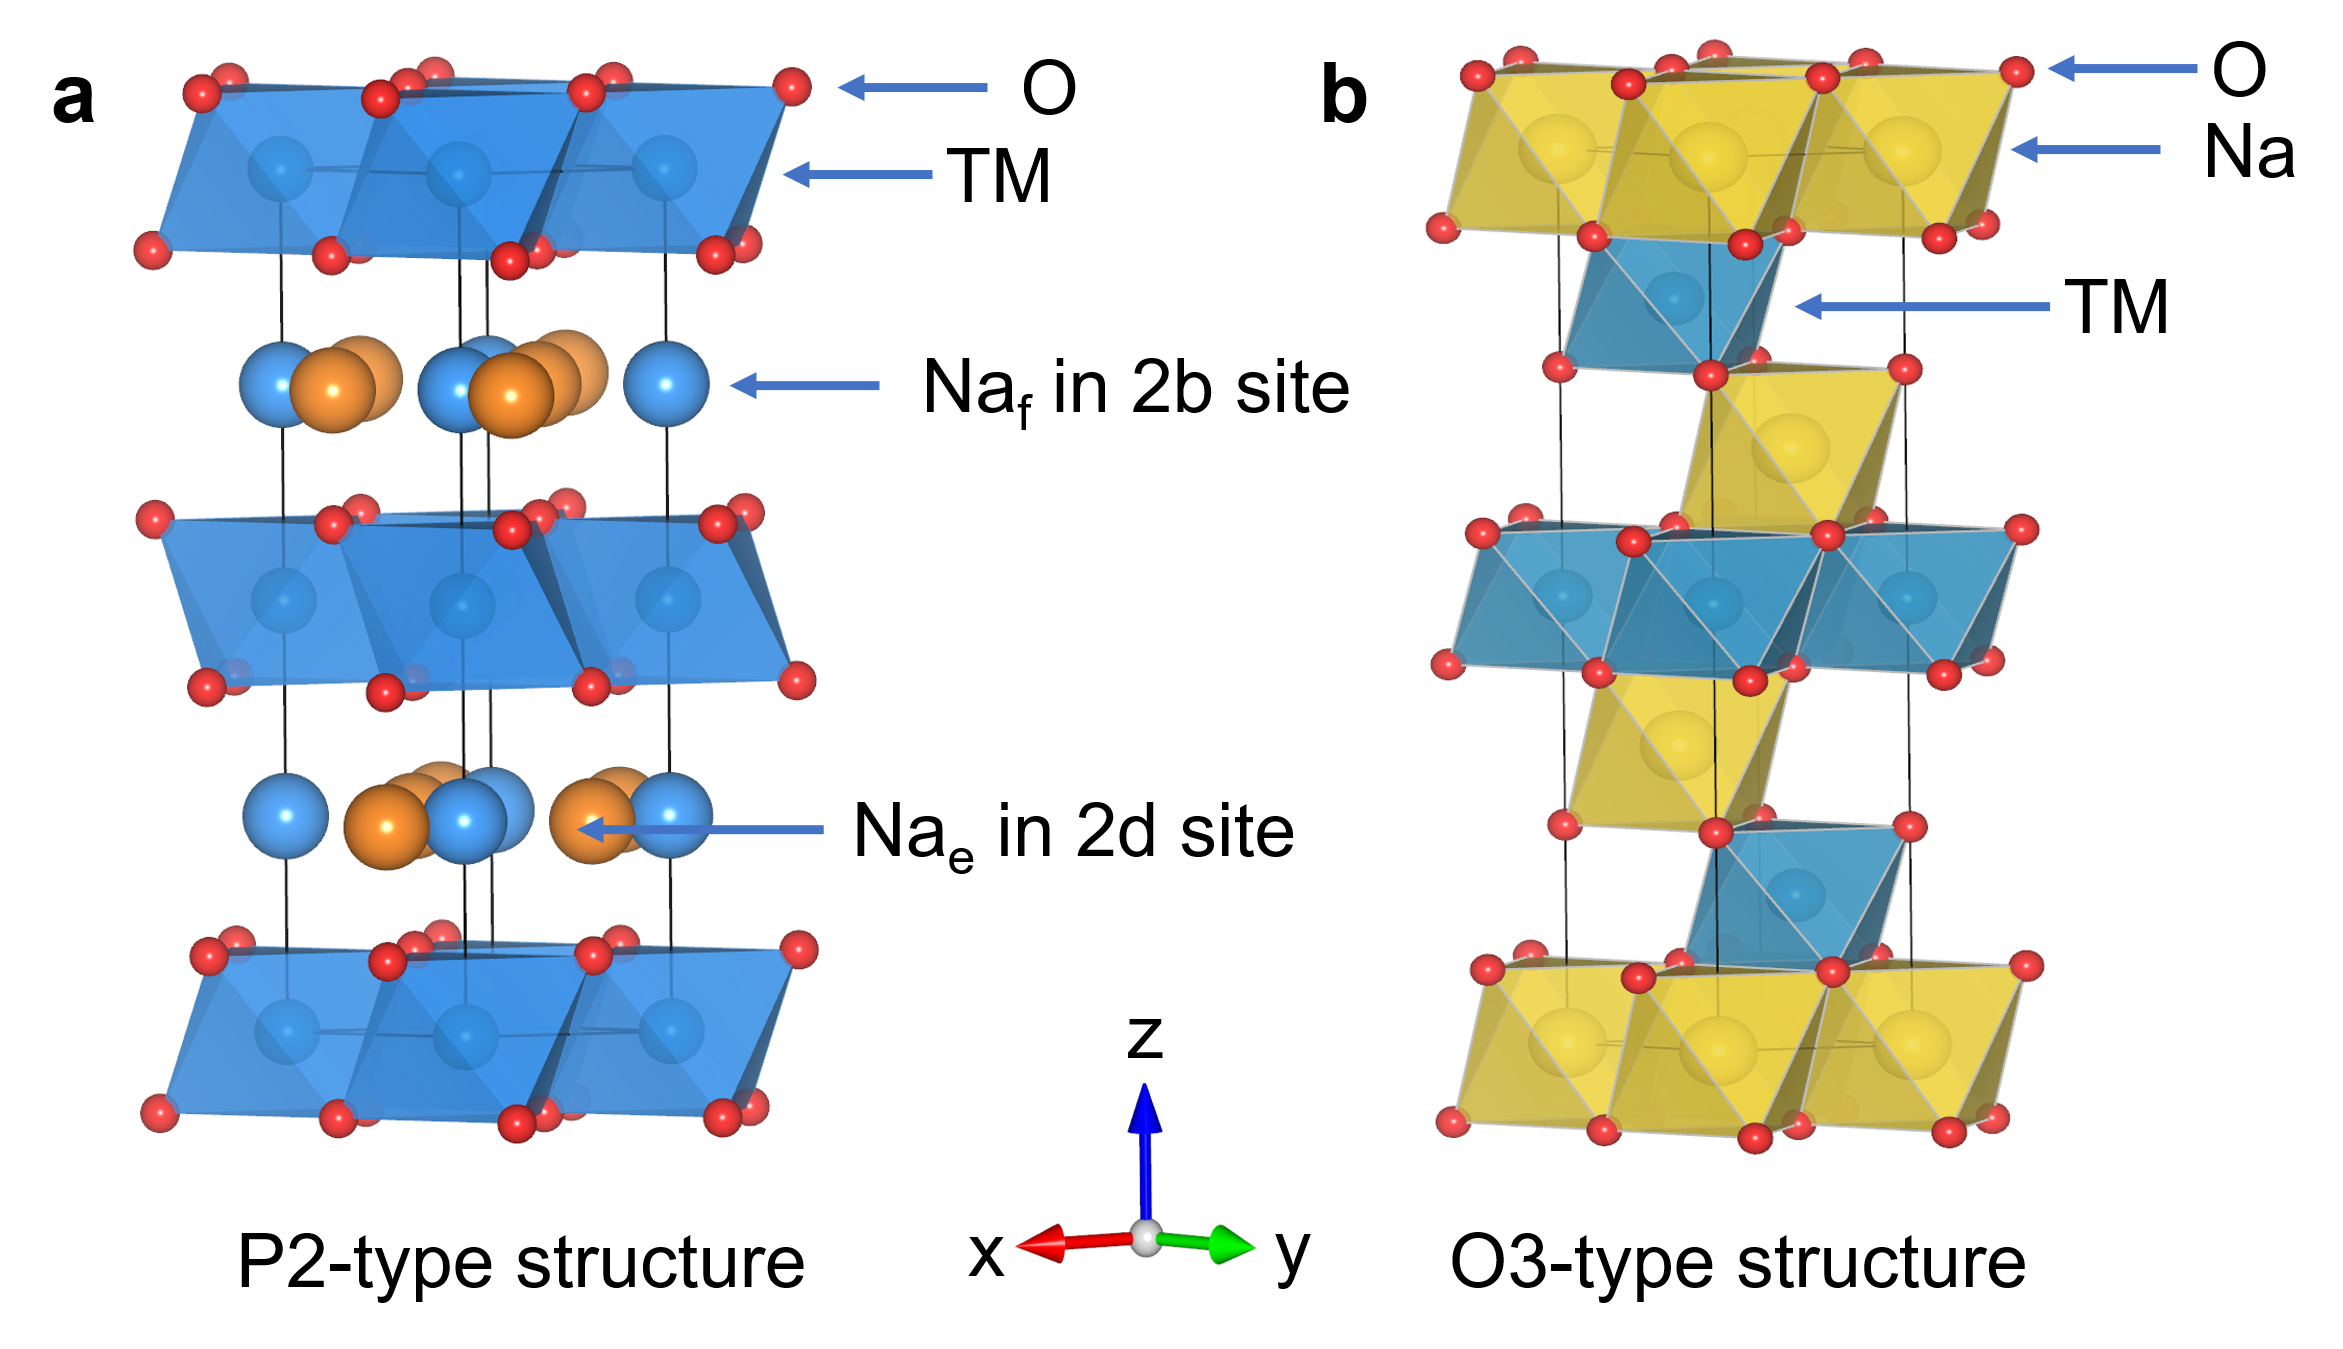


**Supplementary Fig. 1 The P2-and O3-type crystal structures. a, The hexagonal structure of P2-type oxide with the space group of *P*63*/mmc* (194). b, The Rhombohedral structure O3-type oxide with the space group of *R-3m* (166).** The TM stand for transition metal.


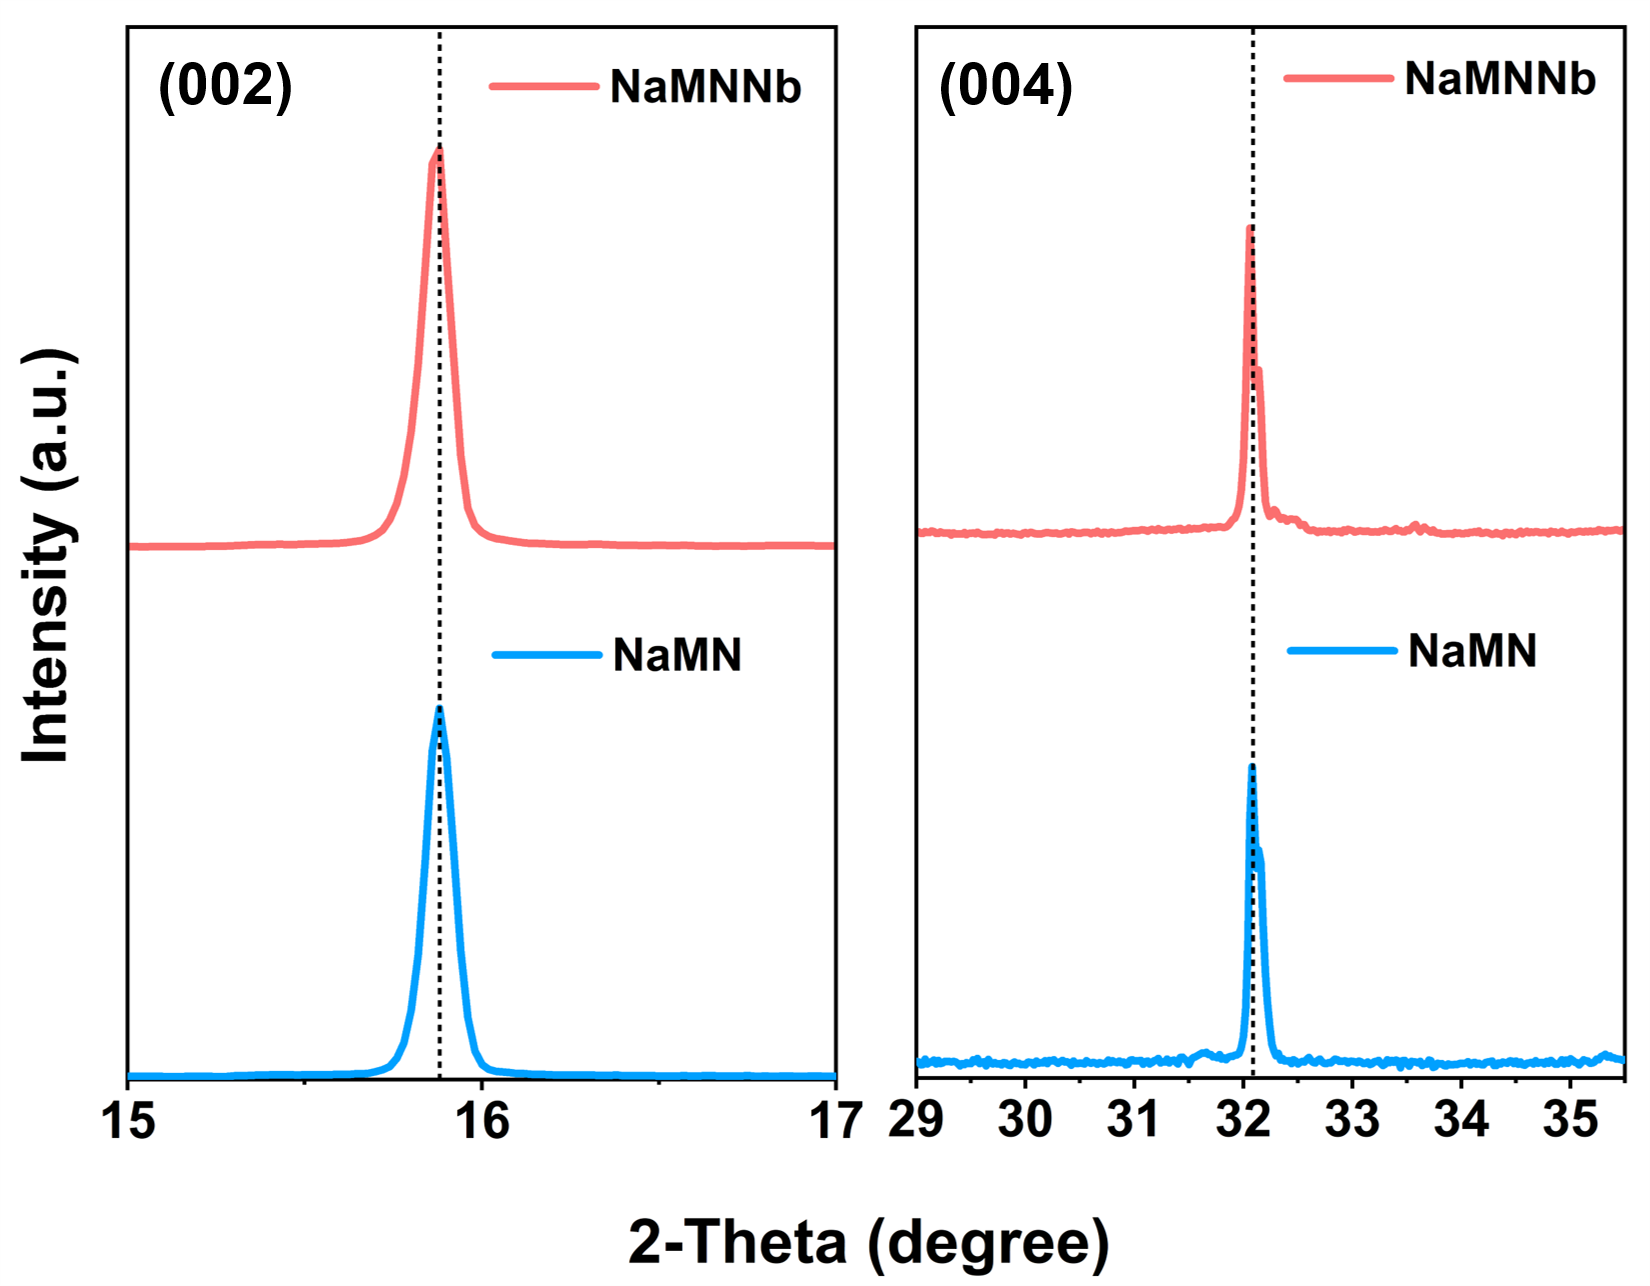


**Supplementary Fig. 2 Shift of the (002) and (004) diffraction peak of P2-NaMN and P2-NaMNNb compounds.**


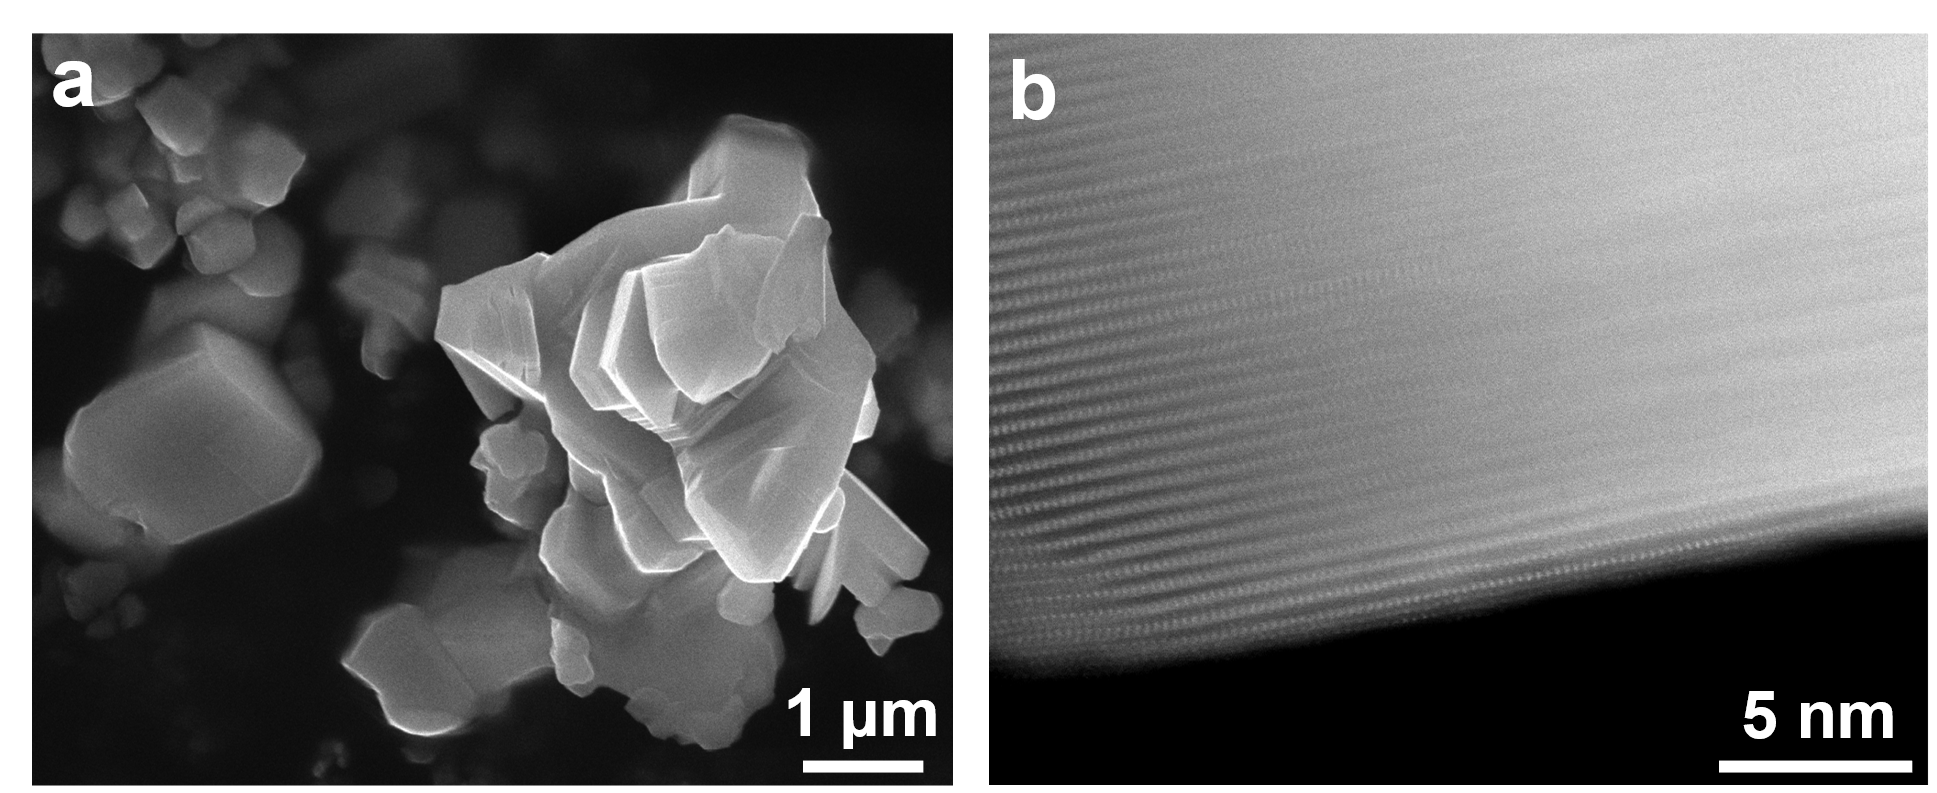


**Supplementary Fig. 3 a, Field-emission scanning electron microscope (SEM) image of P2-NaMNNb compound.** **b, HADDF-STEM image that illustrates the surface reconstruction layer of P2-NaMNNb only exists along [100] direction.**


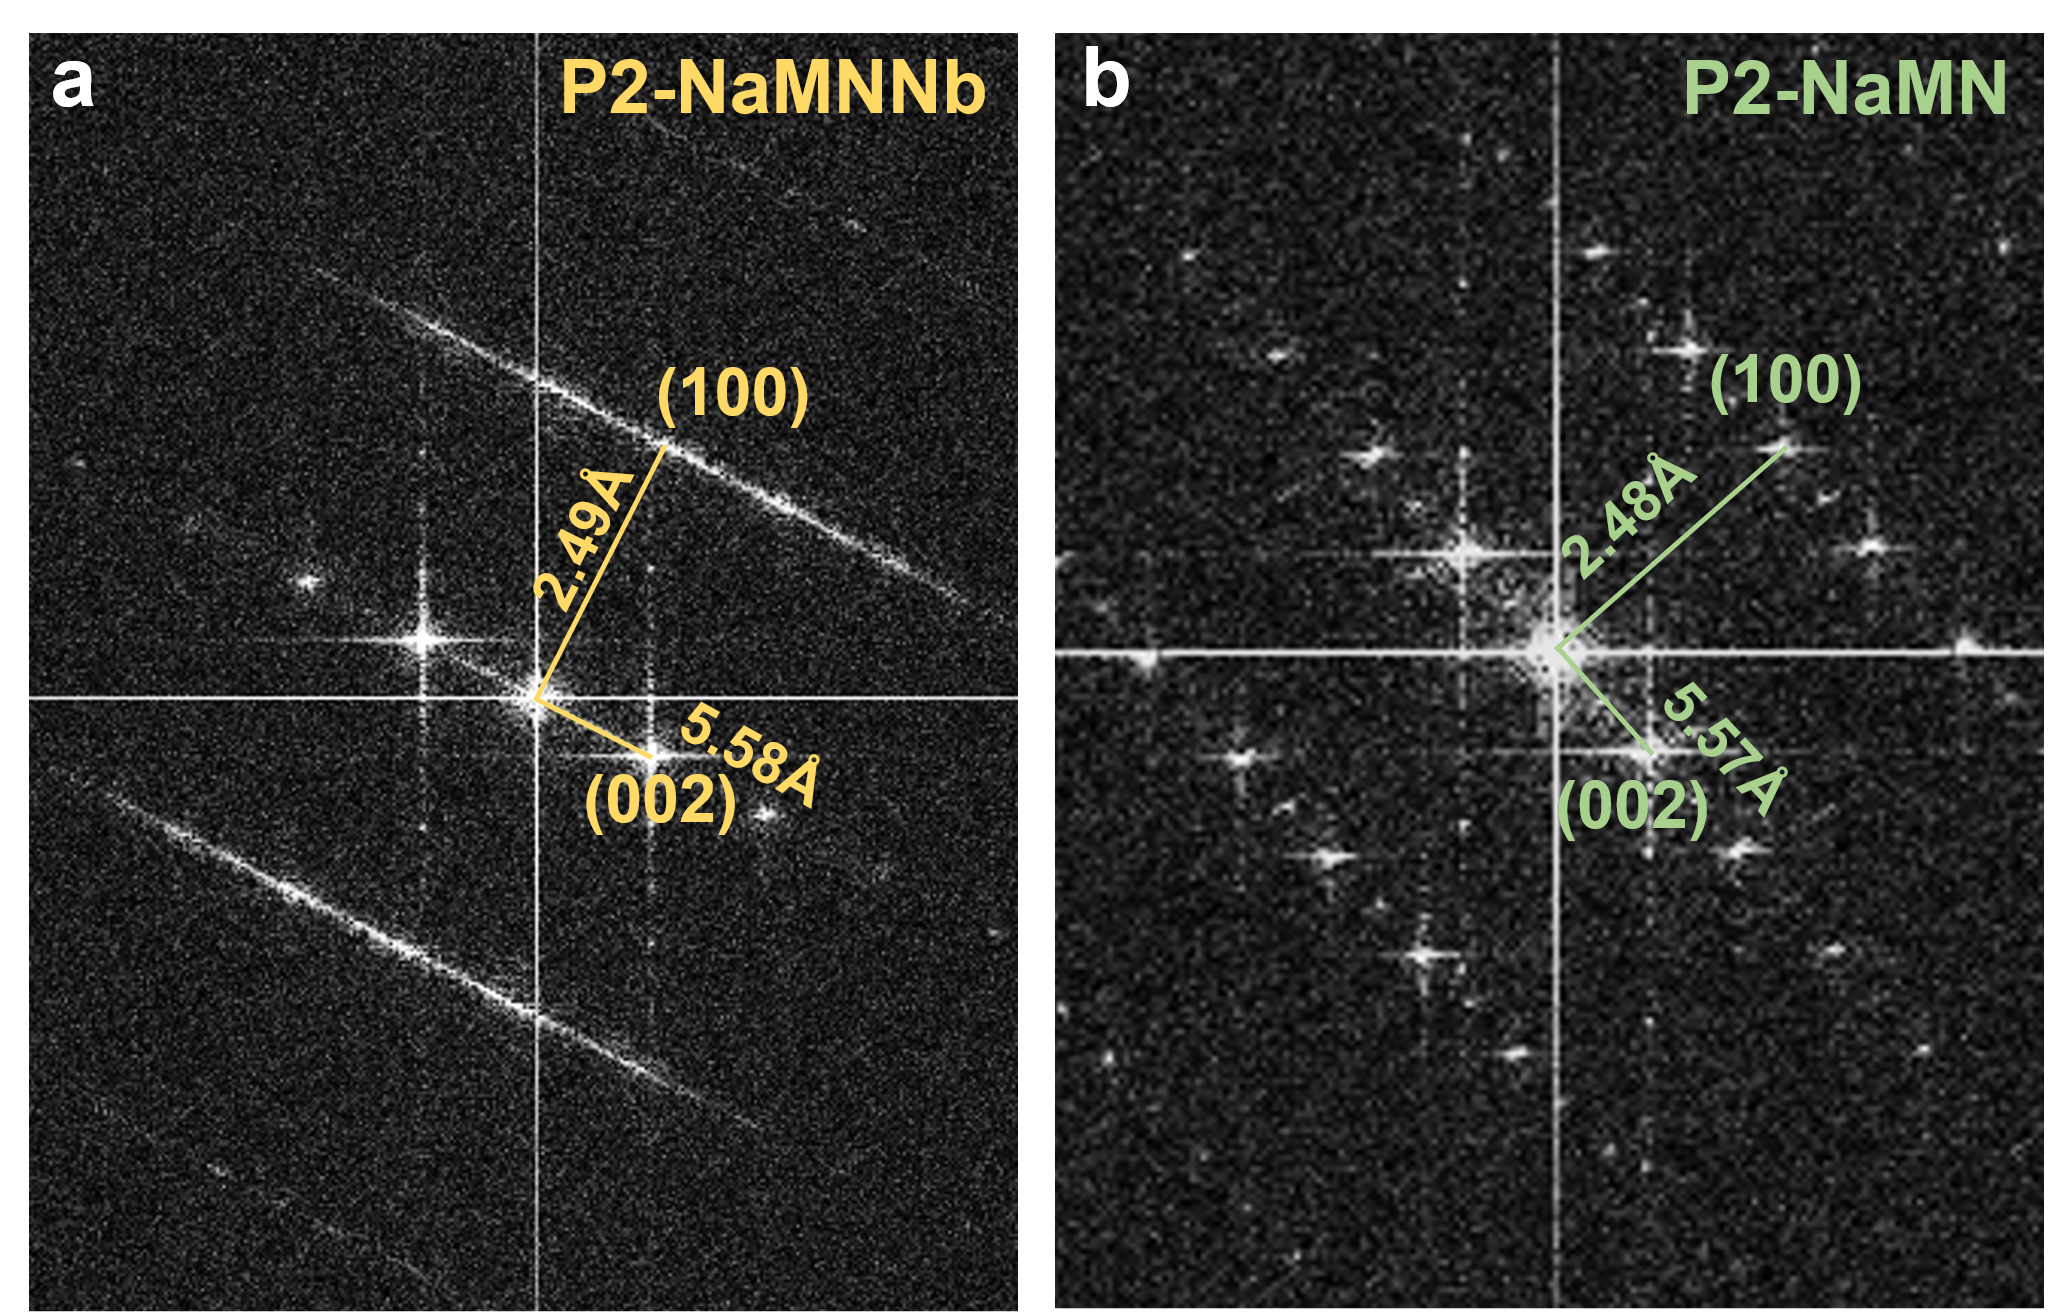


**Supplementary Fig. 4 Fast Fourier Transform (FFT) diffraction of P2-NaMNNb and P2-NaMN.**


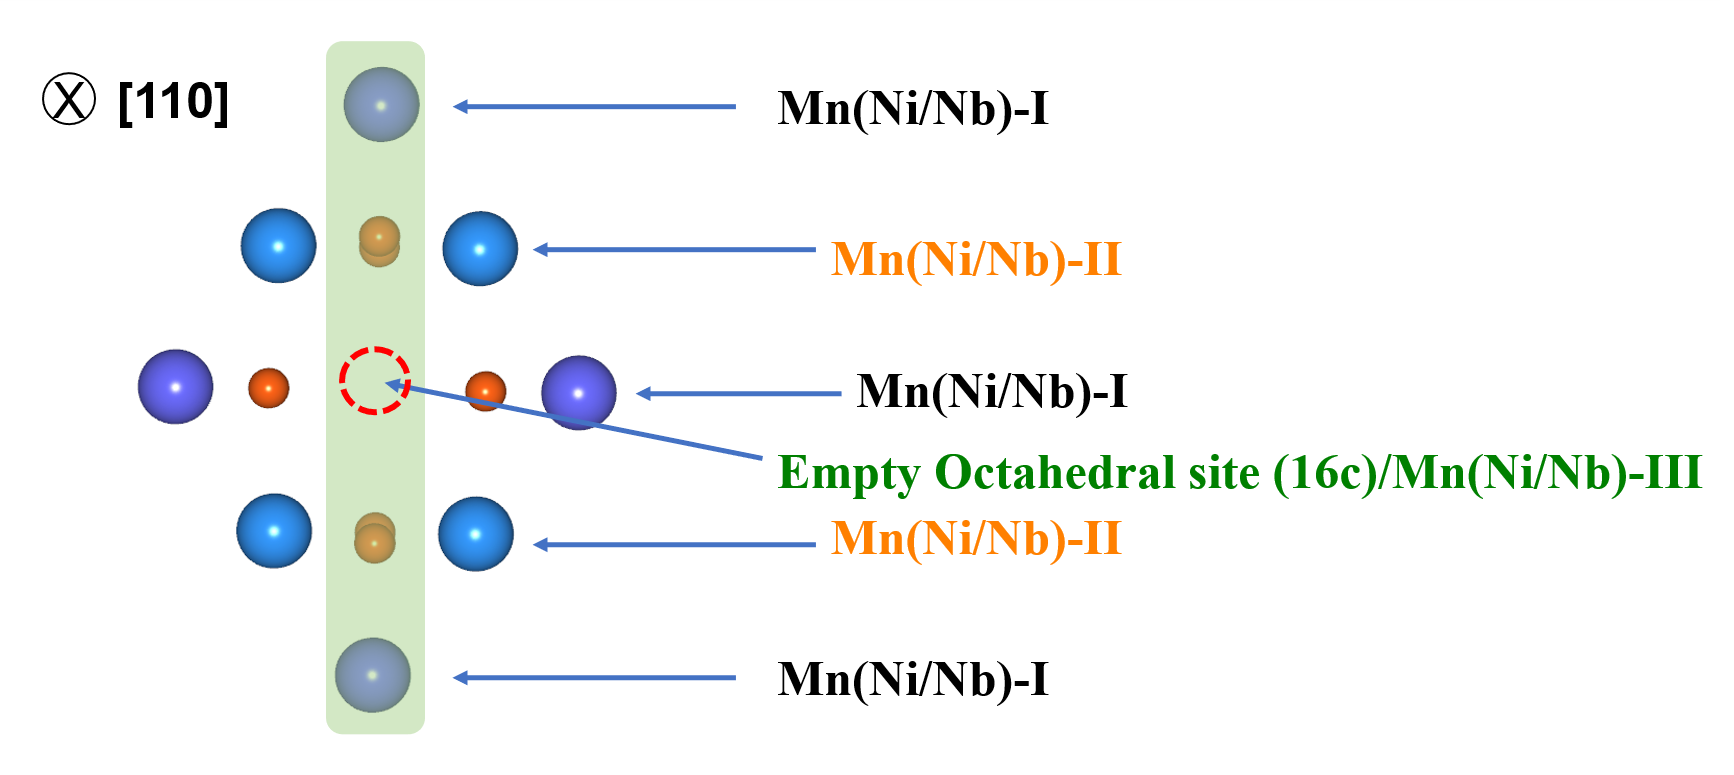


**Supplementary Fig. 5 Schematic diagram of spinel-like-atomic structure projected along [110] crystallographic direction.**


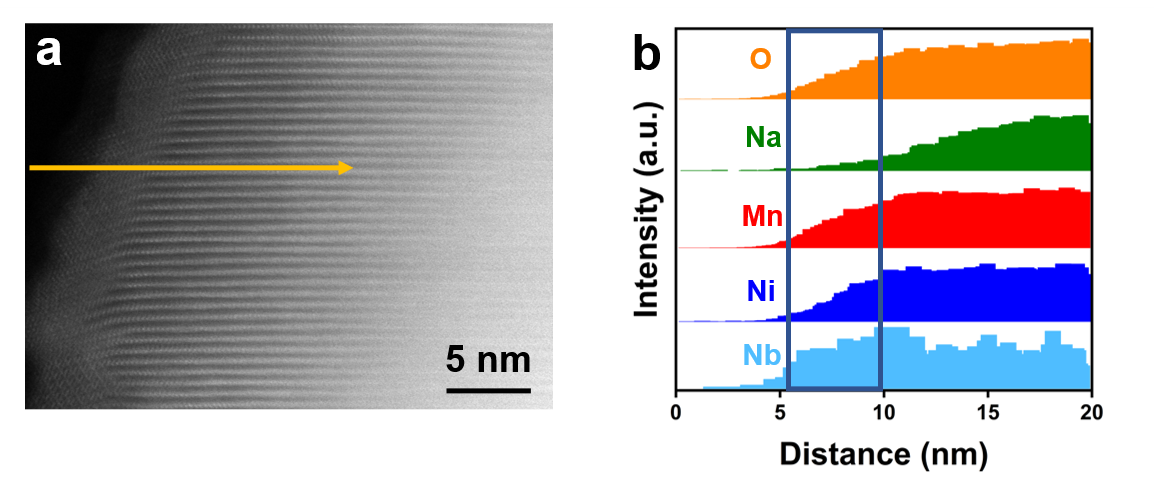


**Supplementary Fig. 6 a, STEM-HAADF image showing Energy Spectrum Line Scan position. B, Corresponding EDS line profiles of (a) O (orange), Na (green), Mn (red), Ni (blue) and Nb (cyan-blue).**


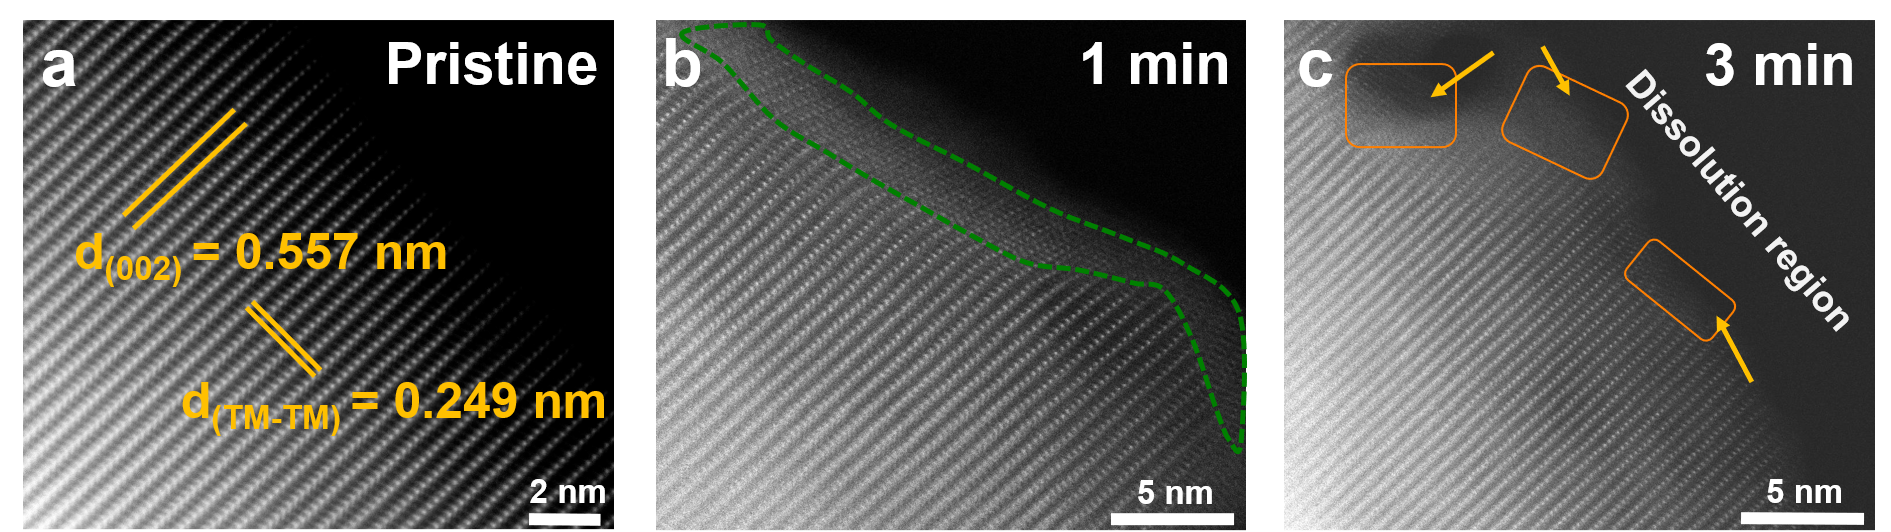


**Supplementary Fig. 7 a-c, HAADF images of the Na0.78Ni0.3Mn0.67O2 particles projected along [010] zone axes taken after different electron beam irradiation times (0 min, 1 min and 3 min) with a dose rate of ~1.12 × 104 electrons Å-2 s-1, at a dwell time of ~1μs/pixel.**


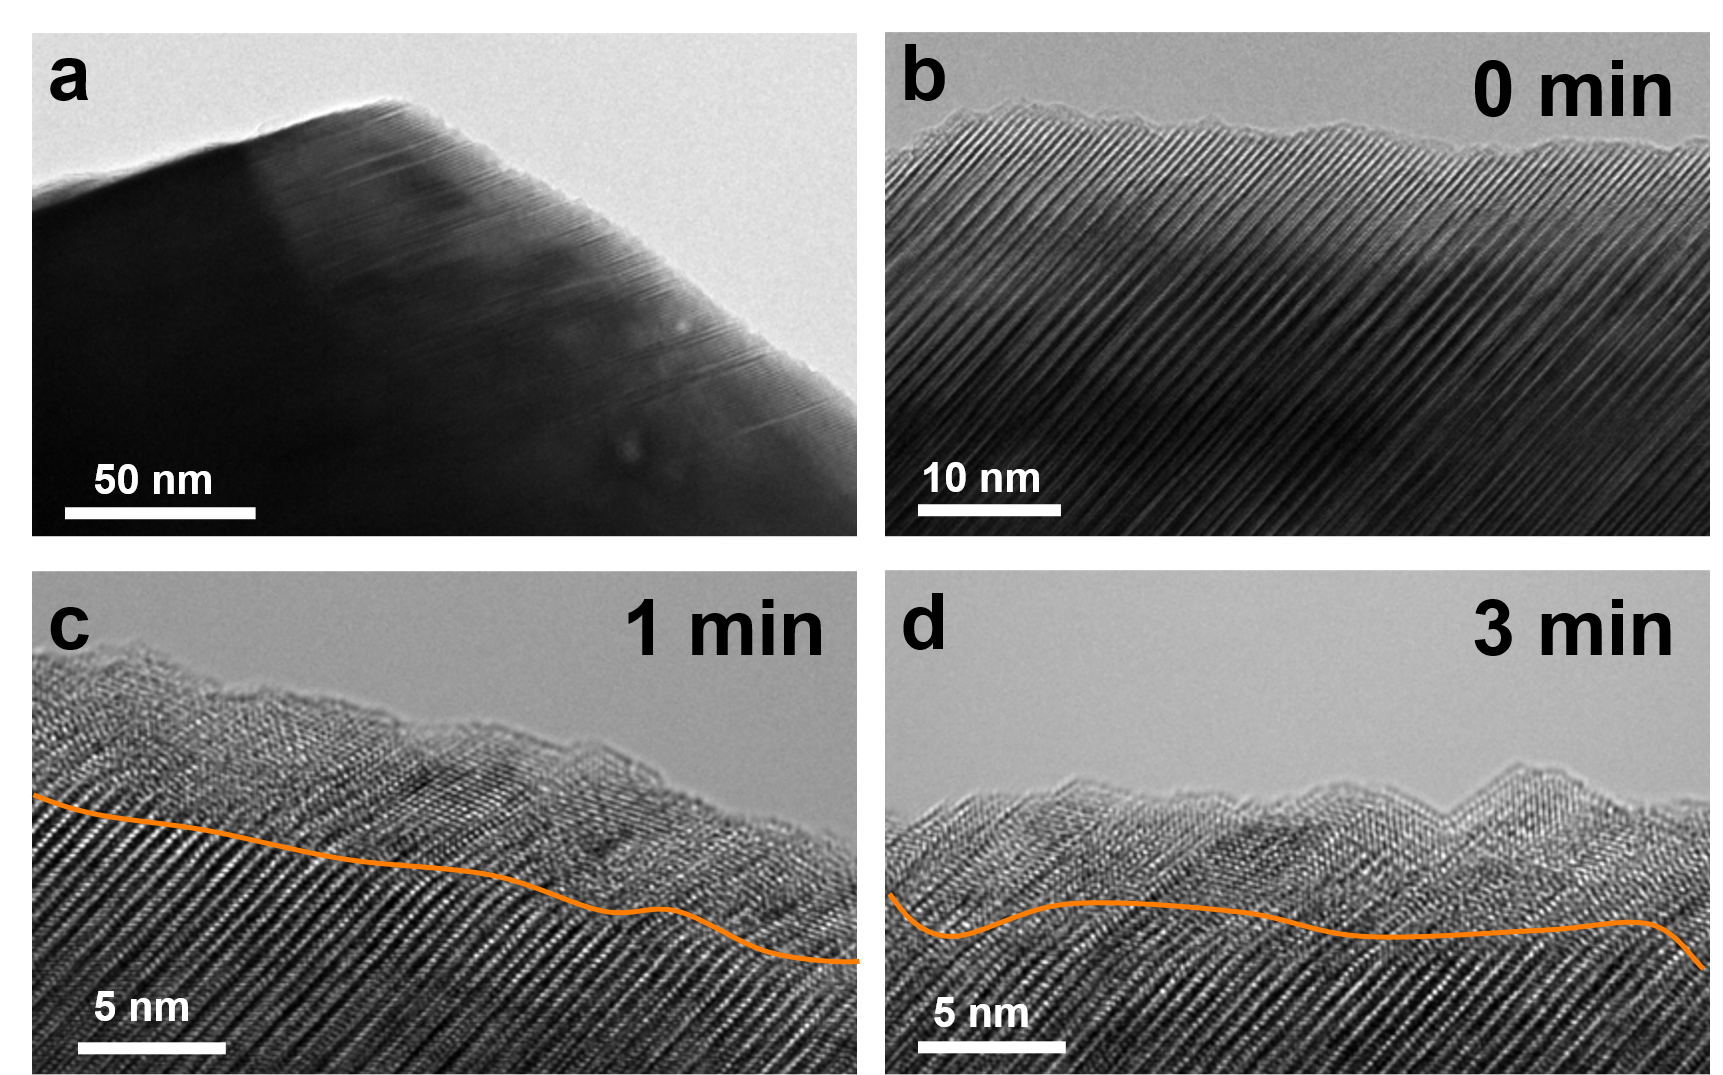


**Supplementary Fig. 8 a, HRTEM image of the Na0.78Ni0.3Mn0.67O2 projected along [010] zone axis, and taken after different electron beam irradiation times (0 min, 1 min and 3 min corresponding to b, c, d.**


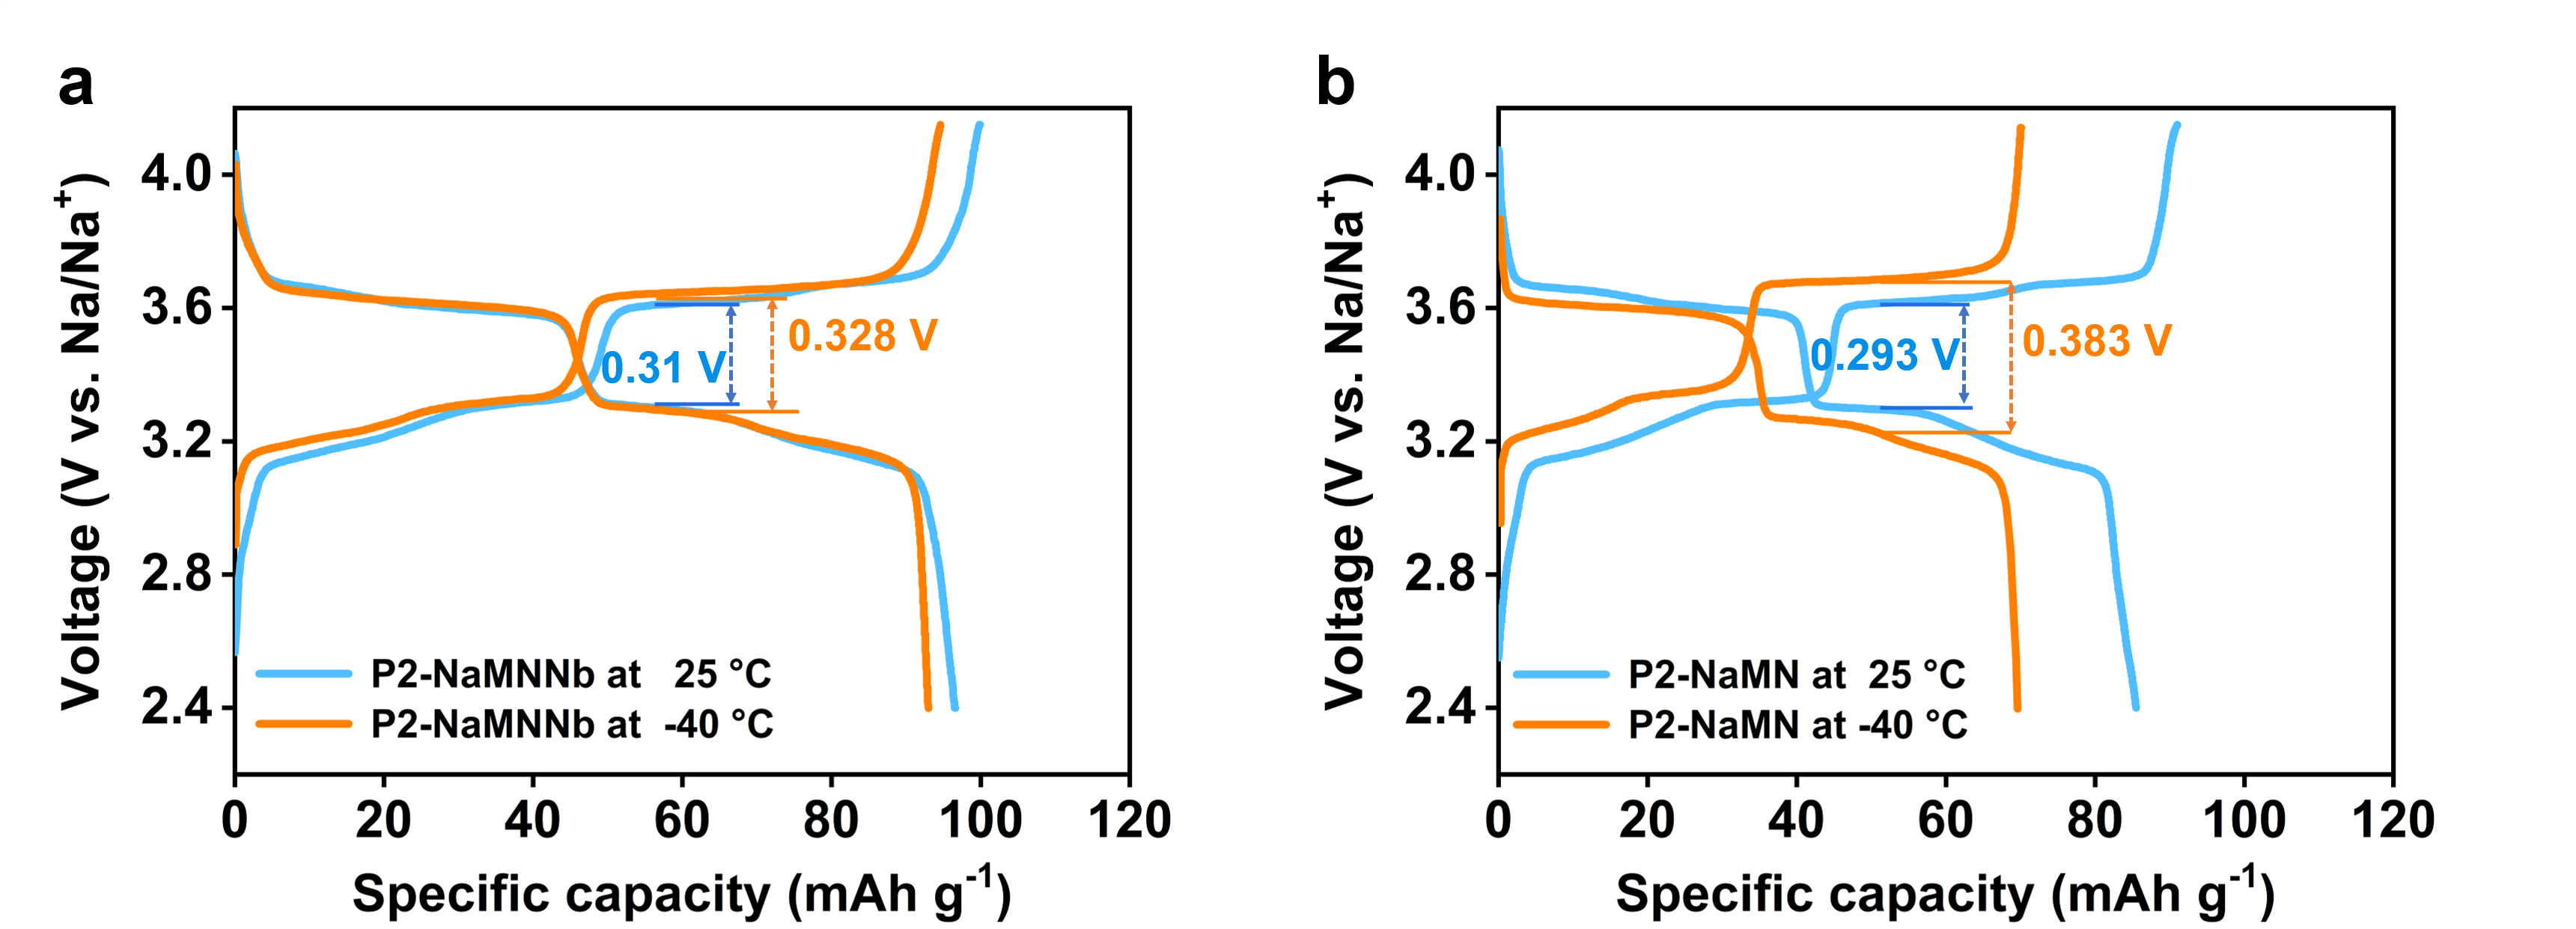


**Supplementary Fig. 9 Charge–discharge curves of a, P2-NaMNNband b, P2-NaMN cathode at 25 °C and -40 °C.**


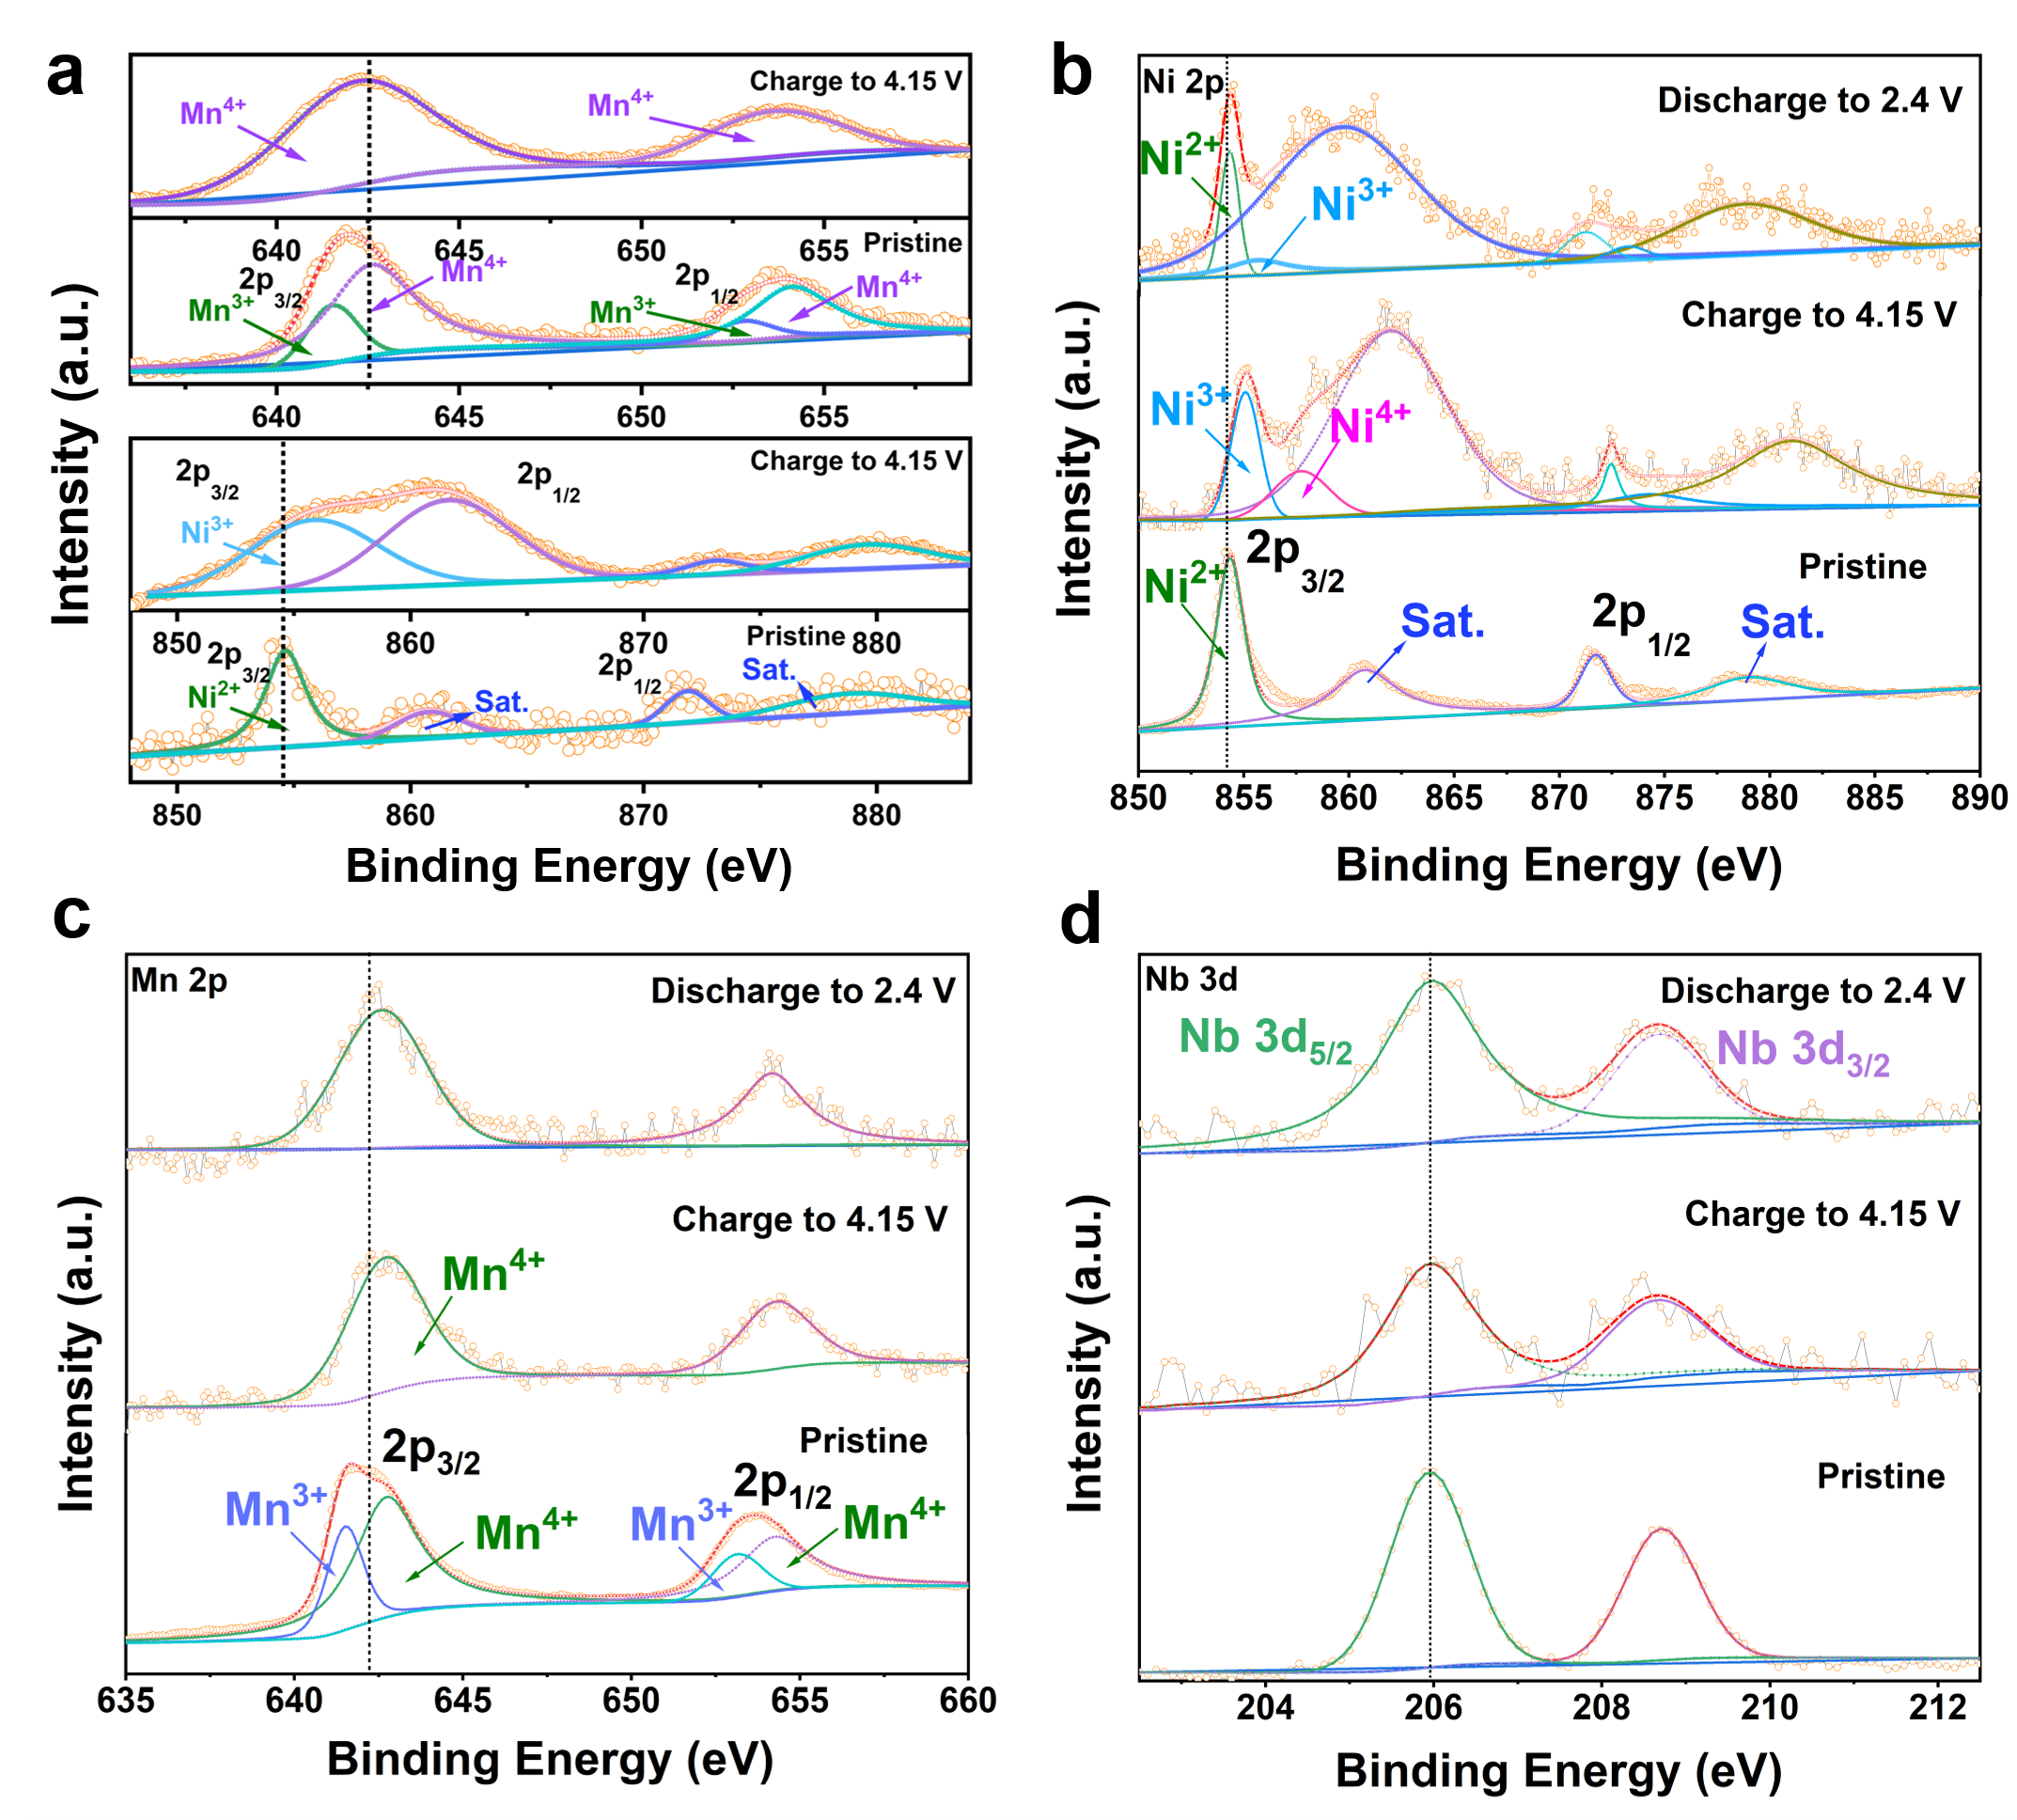


**Supplementary Fig. 10 Ex-situ XPS analysis of a Ni 2p and Mn 2p for P2-NaMN at pristine state, charge to 4.15 V. b, Ni 2p, c, Mn 2p and d, Nb 3d for P2-NaMNNb at pristine state, charge to 4.15 V and discharge to 2.4 V, respectively.**

The valance states of the elements at different charge/discharge voltages of P2-NaMN and P2-NaMNNb were investigated by ex-situ X-ray photoelectron spectroscopy (XPS). For P2-NaMNNb, the high-resolution spectrum of Ni 2p reveals that the 2p3/2 and 2p1/2 peaks of Ni are 854.2 and 871.6 eV, respectively. When charged to 4.15 V, the spectrum of Ni2+ 2p shifts to the direction of high binding energy (Supplementary Fig. 10b). It shifts to Ni3+ and a tiny valence state of Ni4+, indicating oxidation of Ni2+/Ni3+/Ni4+1,2, which means more electrons participate in the redox reaction to contribute more capacity than that of P2-NaMN (Supplementary Fig. 10a). This consequence fits well with the circumstance of CV (Fig. 3a) and charging/discharging curves (Supplementary Fig. 9). After discharged to 2.4 V, the valence of Ni close to +2 with trivial trivalent nickel, this is because the valance of Ni is not completely reduced to +2 at 2.4 V. The XPS Mn 2p spectrum of P2-NaMNNb (Supplementary Fig. 10c) depicts that co-existence of Mn3+ and Mn4+ with the ratio of 0.27 : 0.73 owing to the Nb doping. During the charging process, the valence of Mn gradually increases, and only Mn4+ exists when reaching 4.15 V. Moreover, the valence of Mn remains +4 after discharged to 2.4 V, indicating that the presence of Mn4+ is steady upon cycling. The valence of Nb is +5 during the entire charge and discharge process, which proving that Nb does not participate in charge compensation (Supplementary Fig. 10d).


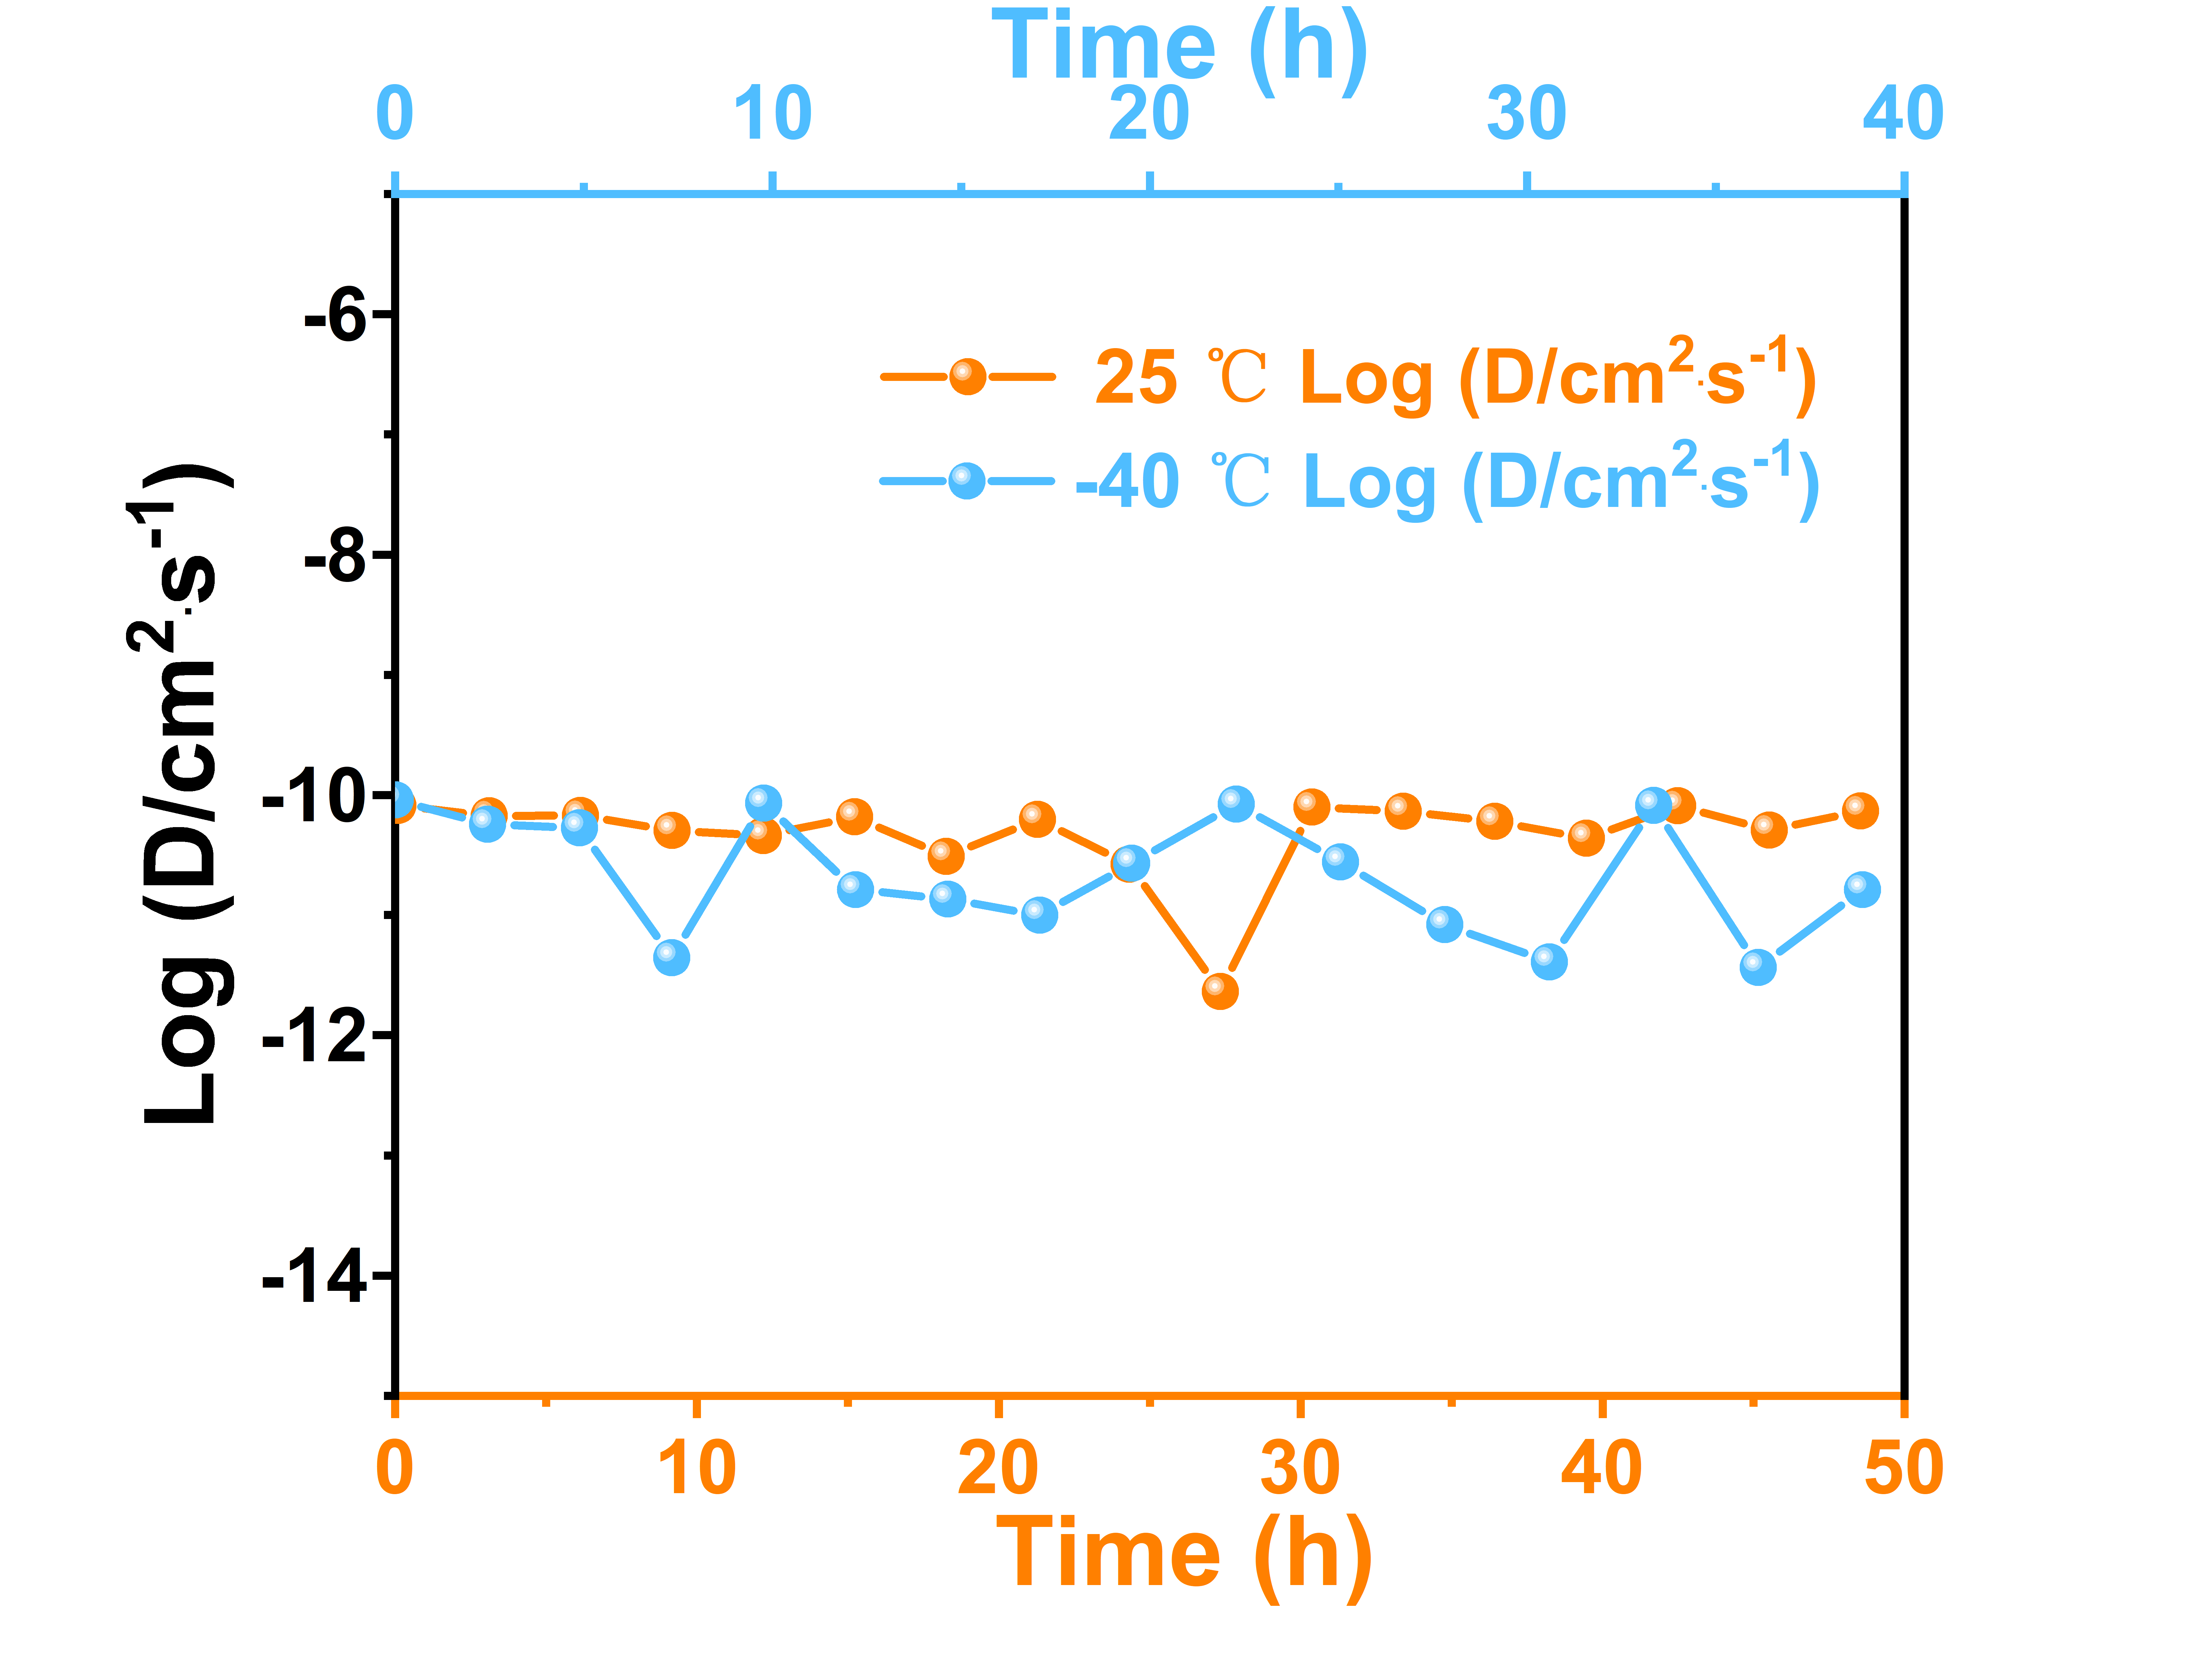


**Supplementary Fig. 11 Calculated Na+ diffusion coefficients of P2-NaMN electrodes from GITT at 25 and -40 °C.**


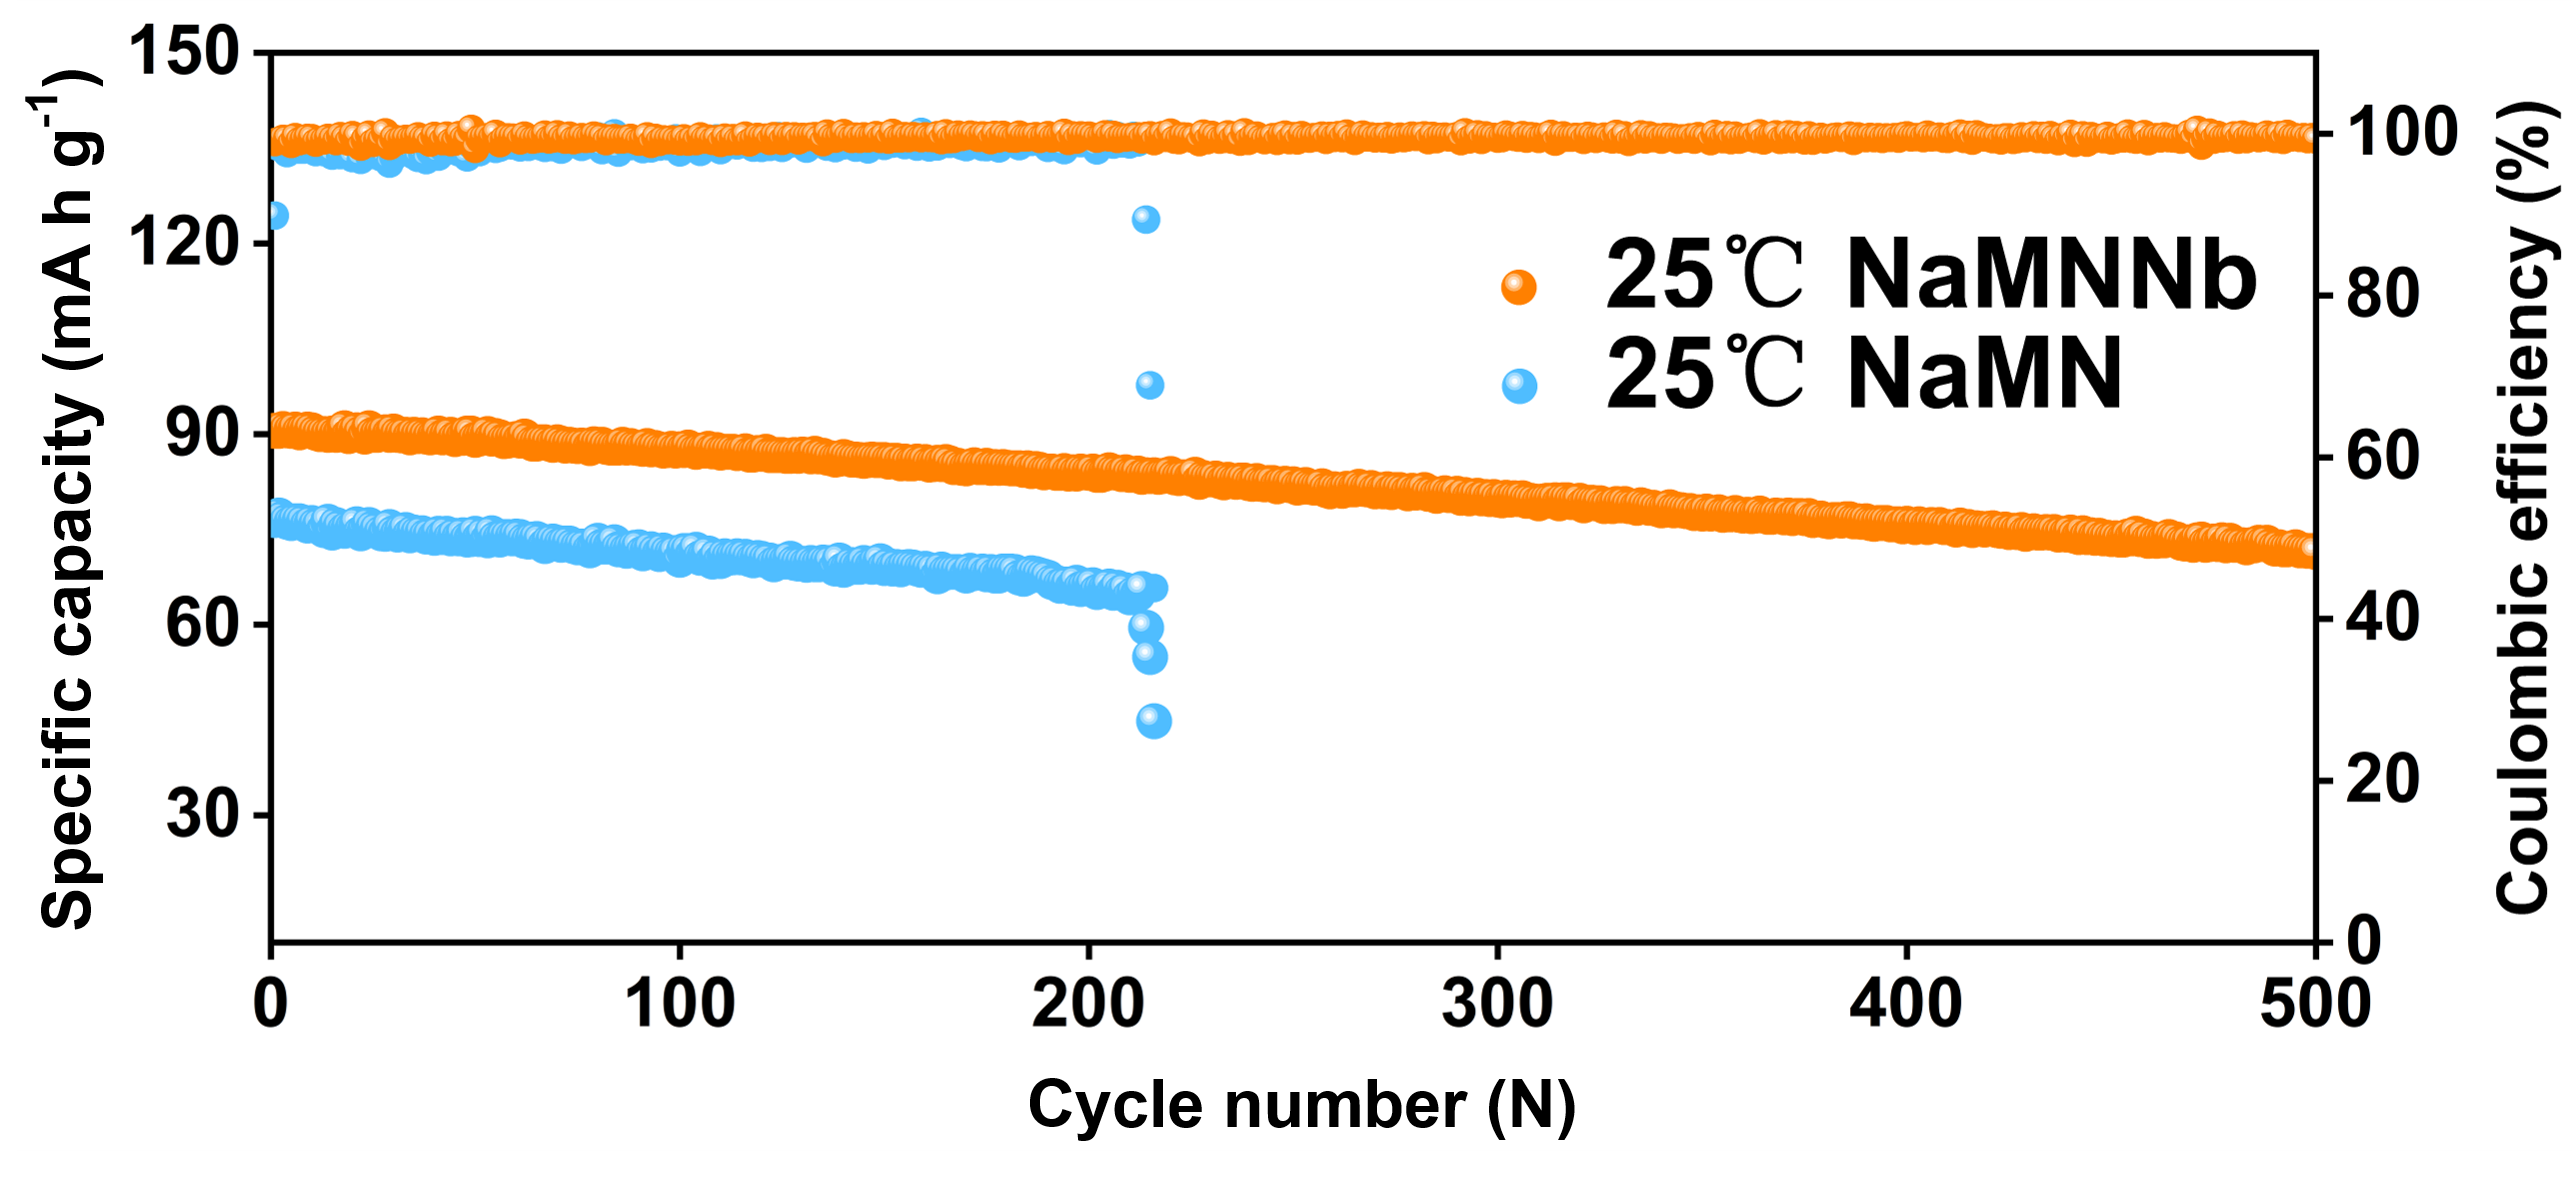


**Supplementary Fig. 12 Long-term cycling stability at a high rate of 5 C at 25 °C.**


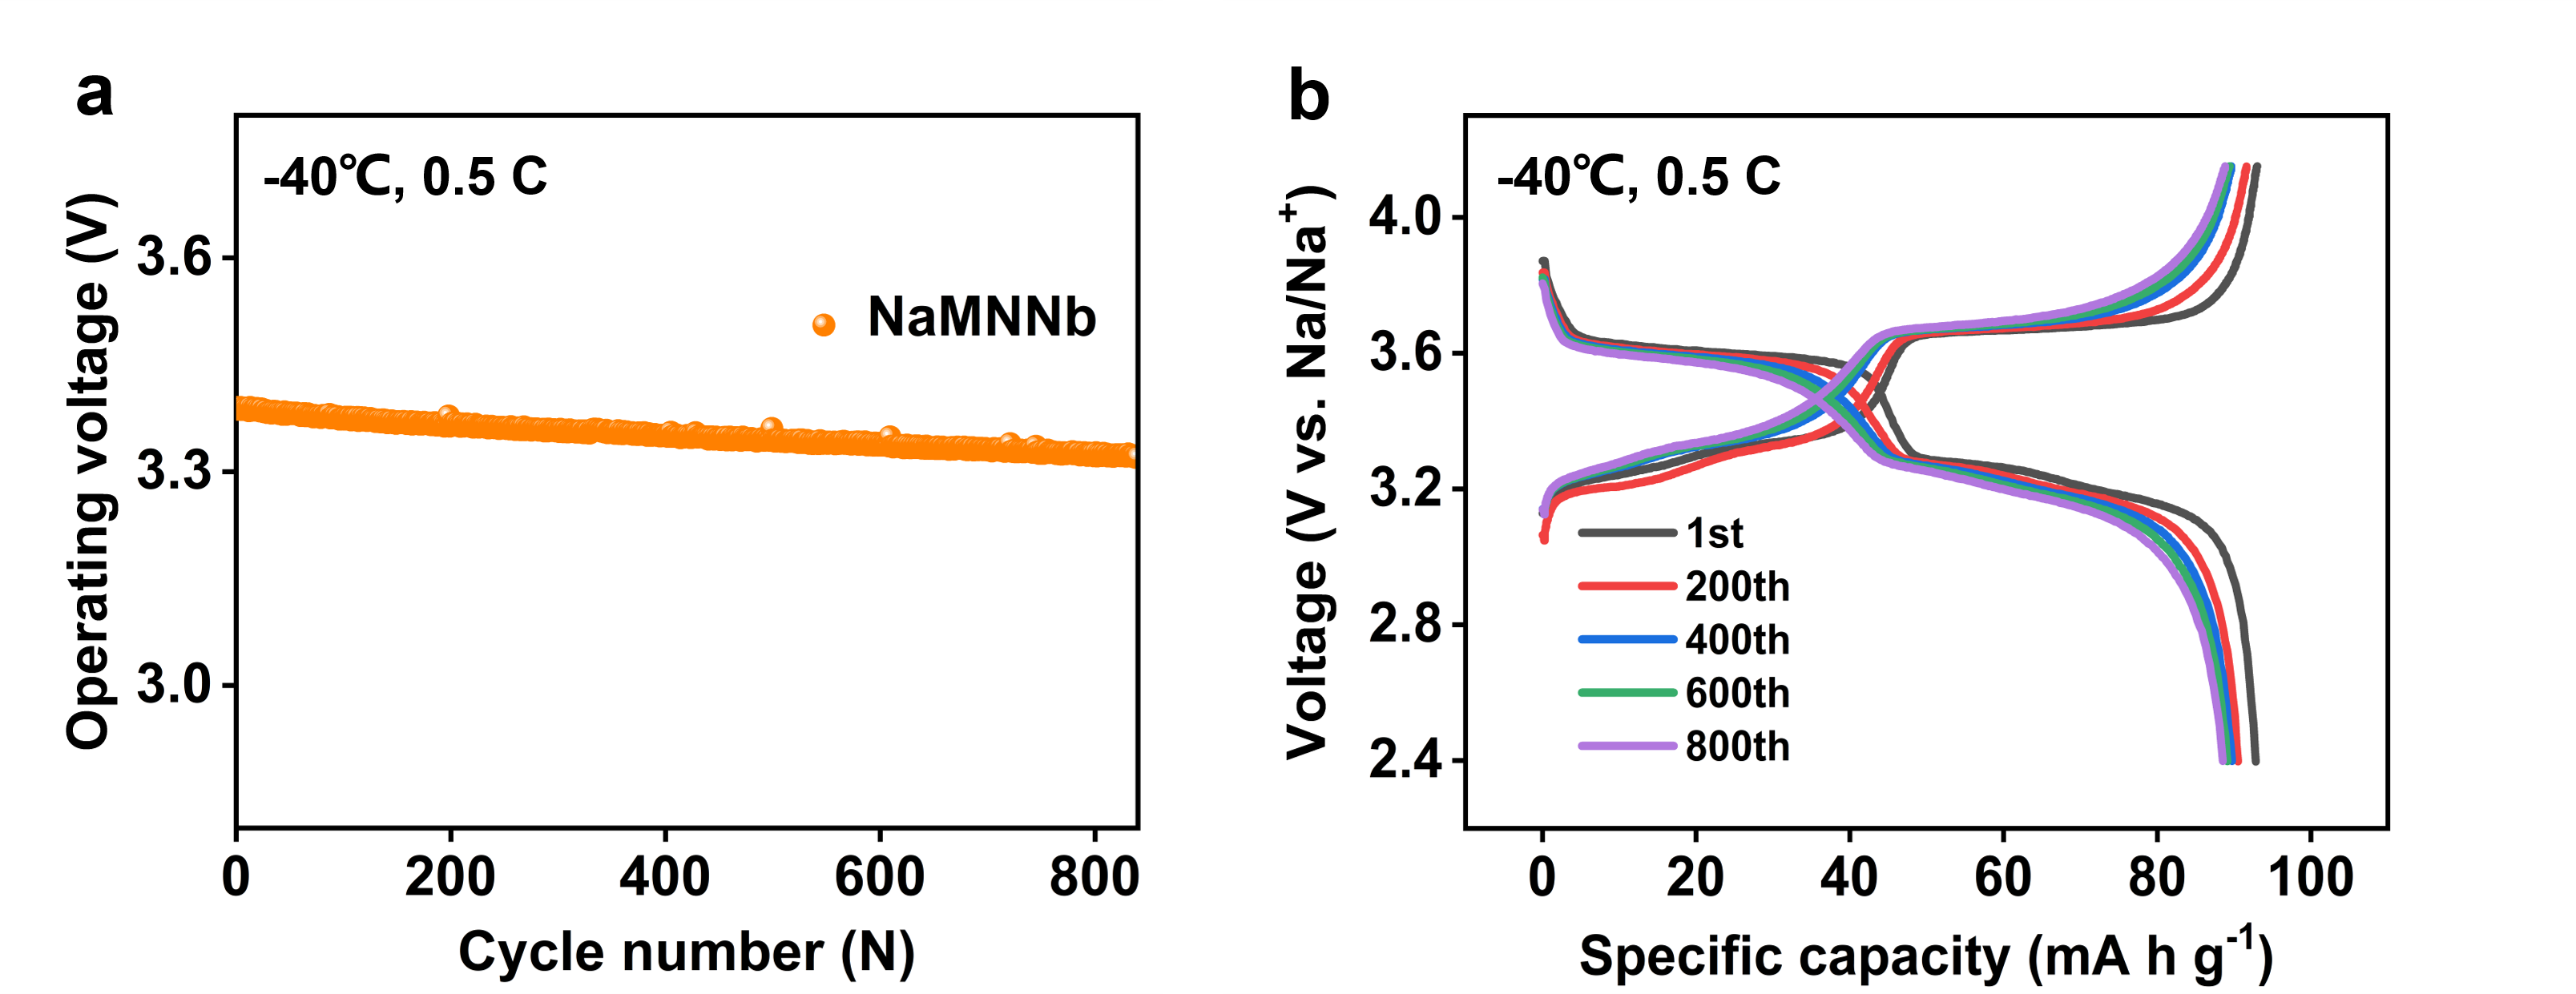


**Supplementary Fig. 13 a, The average working voltage (> 3.3 V) in the rate of 0.5 C at -40 °C. b, Corresponding charging and discharging curves of various cycle numbers at -40 °C.**


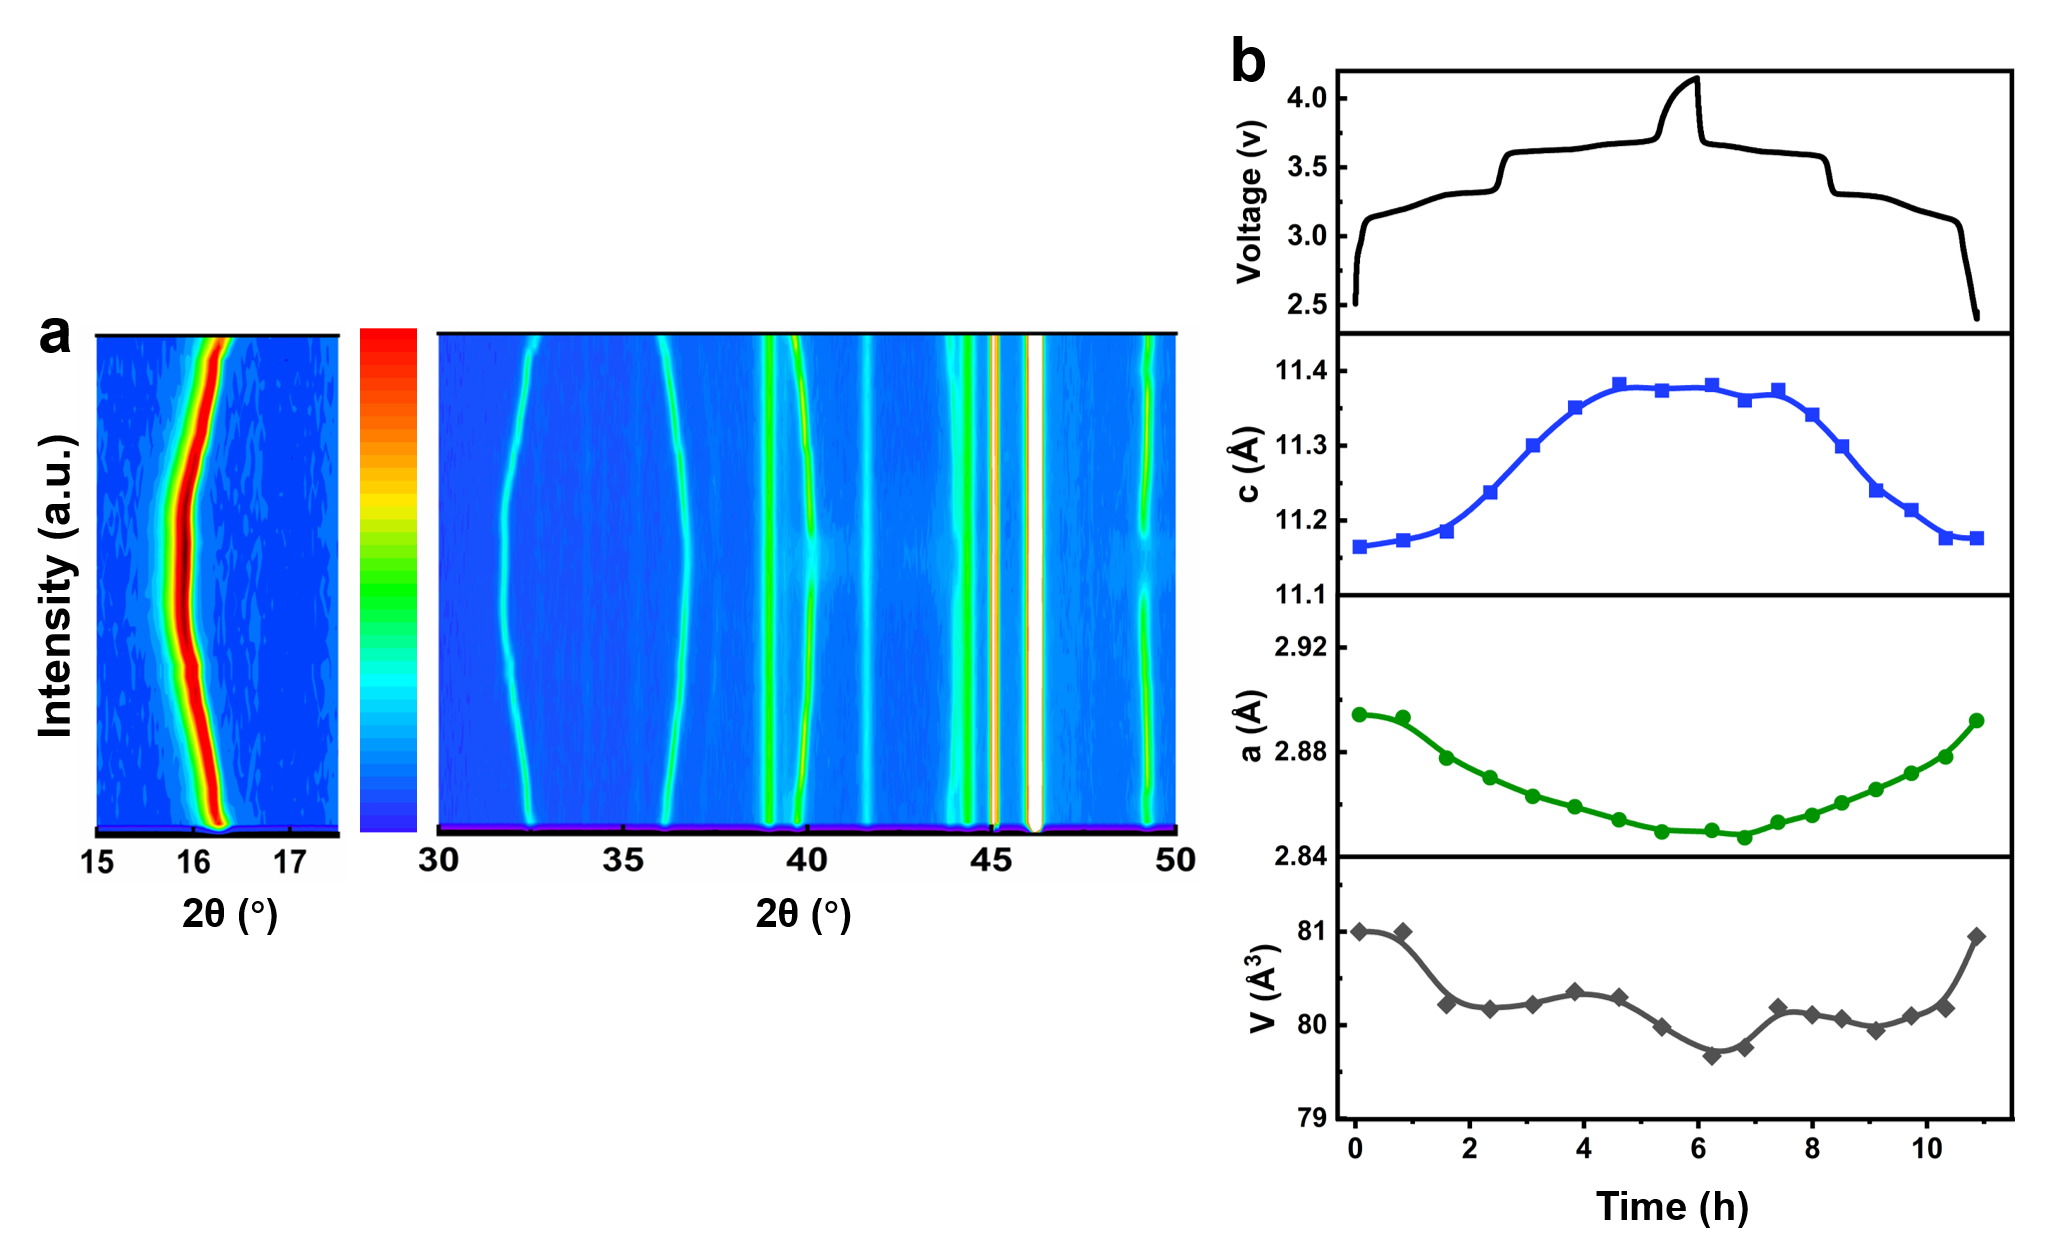


**Supplementary Fig.14 Structure evolution of P2-NaMNNb upon Na+ extraction/insertion. a, The typical intensity contour maps of in-situ XRD patterns** **corresponding to the charge and discharge curves between 2.4-4.15 V. b, The variation of cell parameters *a/b* (green lines), *c* (blue lines), and *V* (gray lines).**


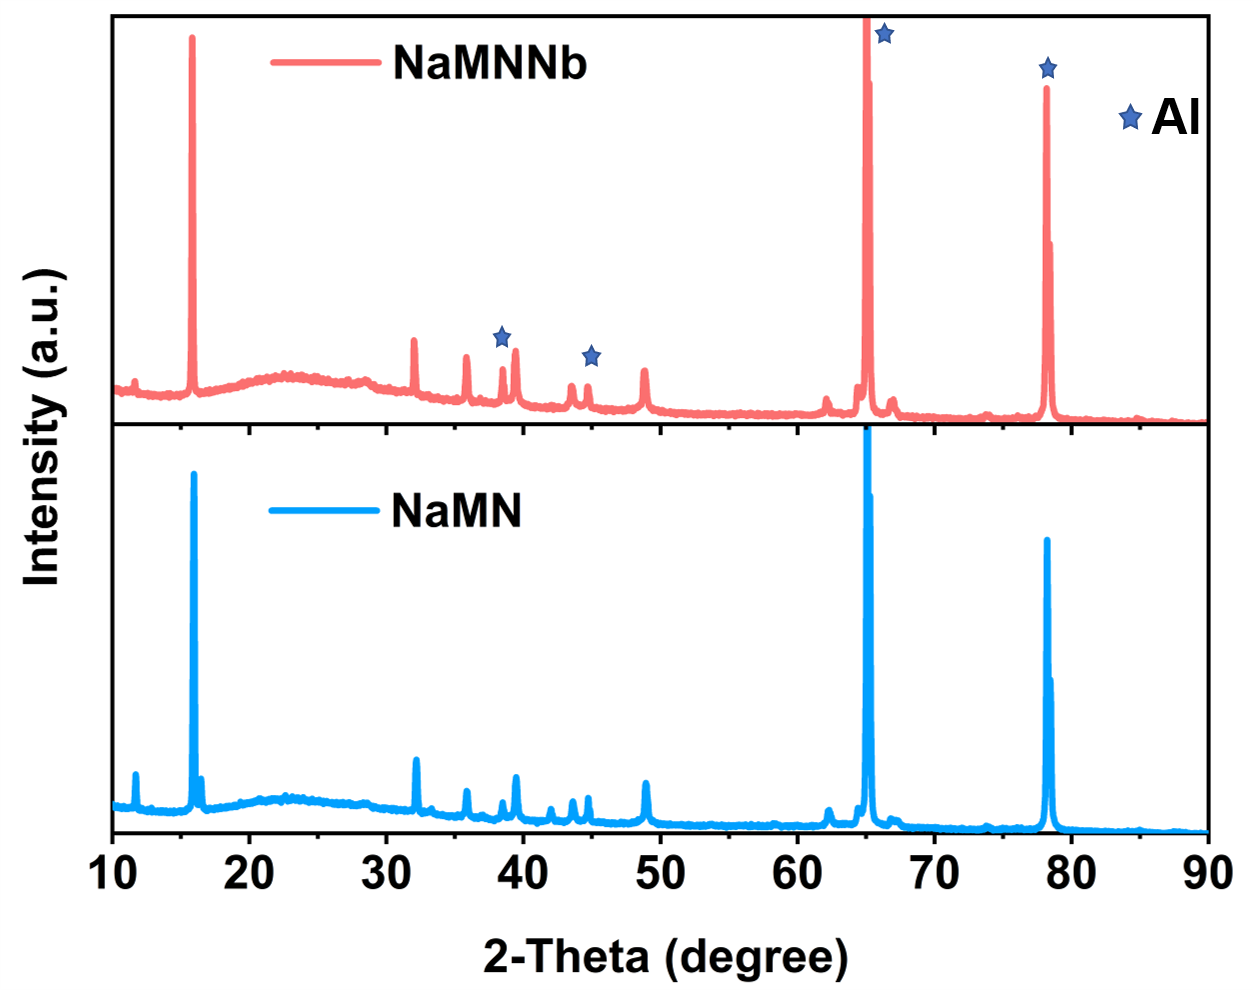


**Supplementary Fig. 15 Comparison of X-ray diffraction patterns of P2-NaMNNb and P2-NaMN after 30 cycles.**


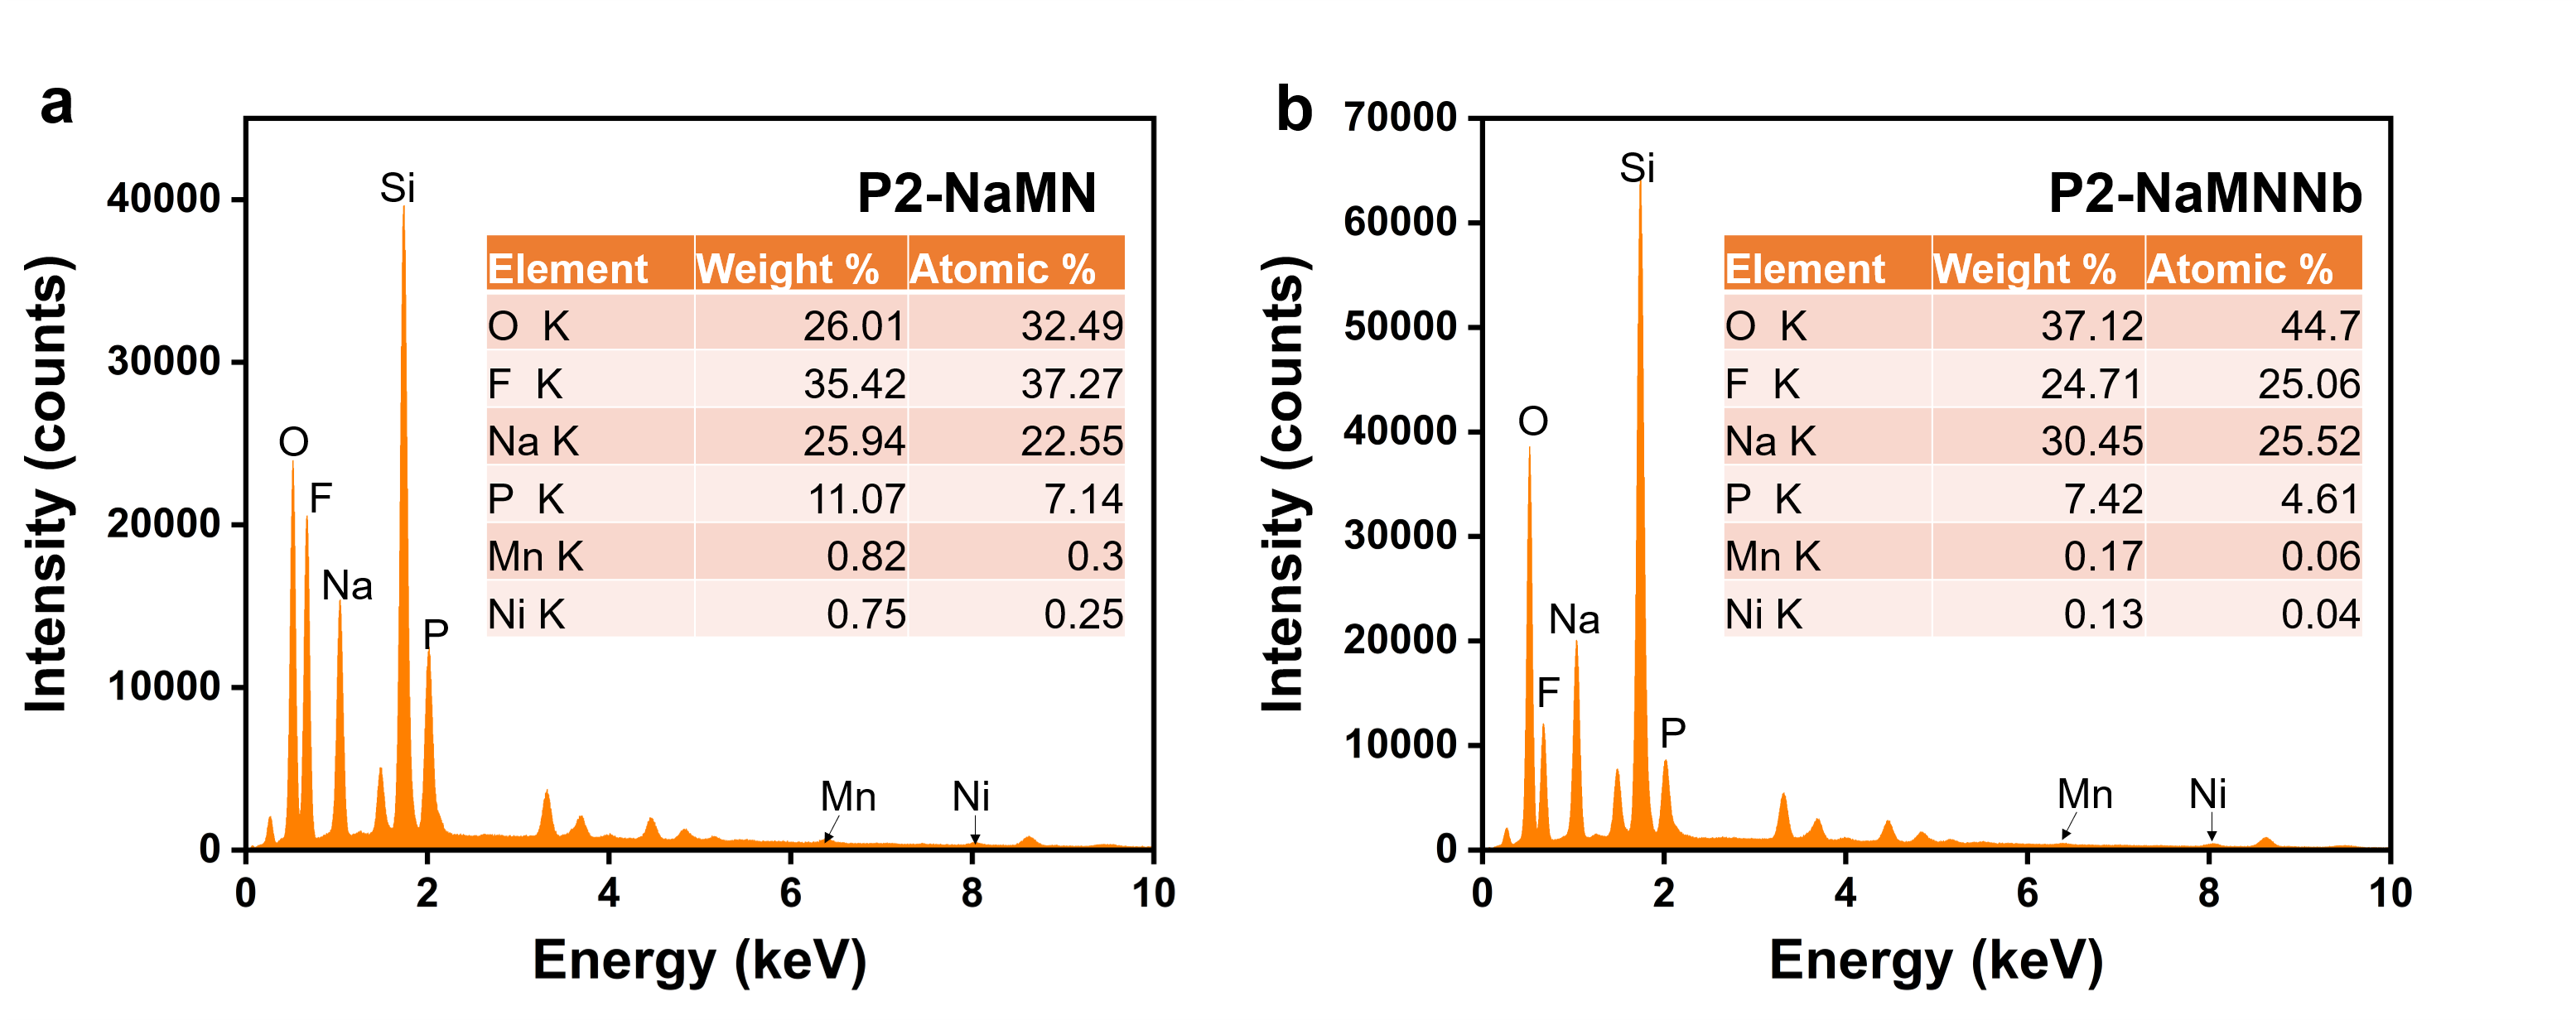


**Supplementary Fig. 16 EDX spectra of a, P2-NaMN, b, P2-NaMNNb of Na anodes after 30 cycles.**


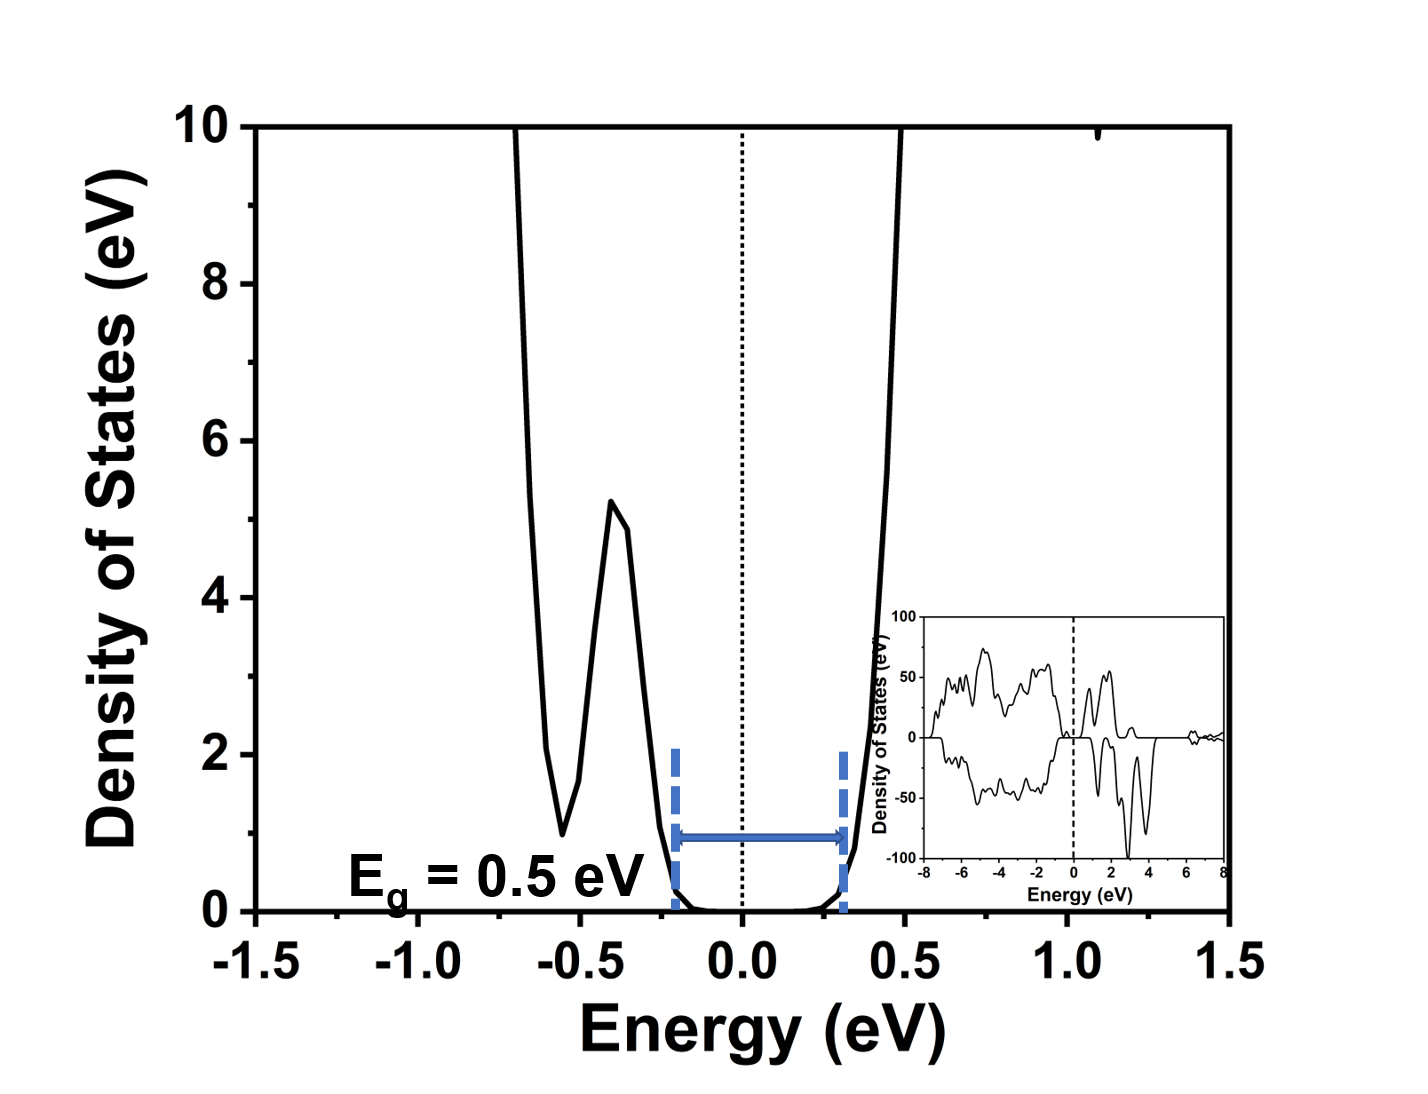


**Supplementary Fig. 17 The** **total density of state of** **Na24Ni10Mn22O64.**


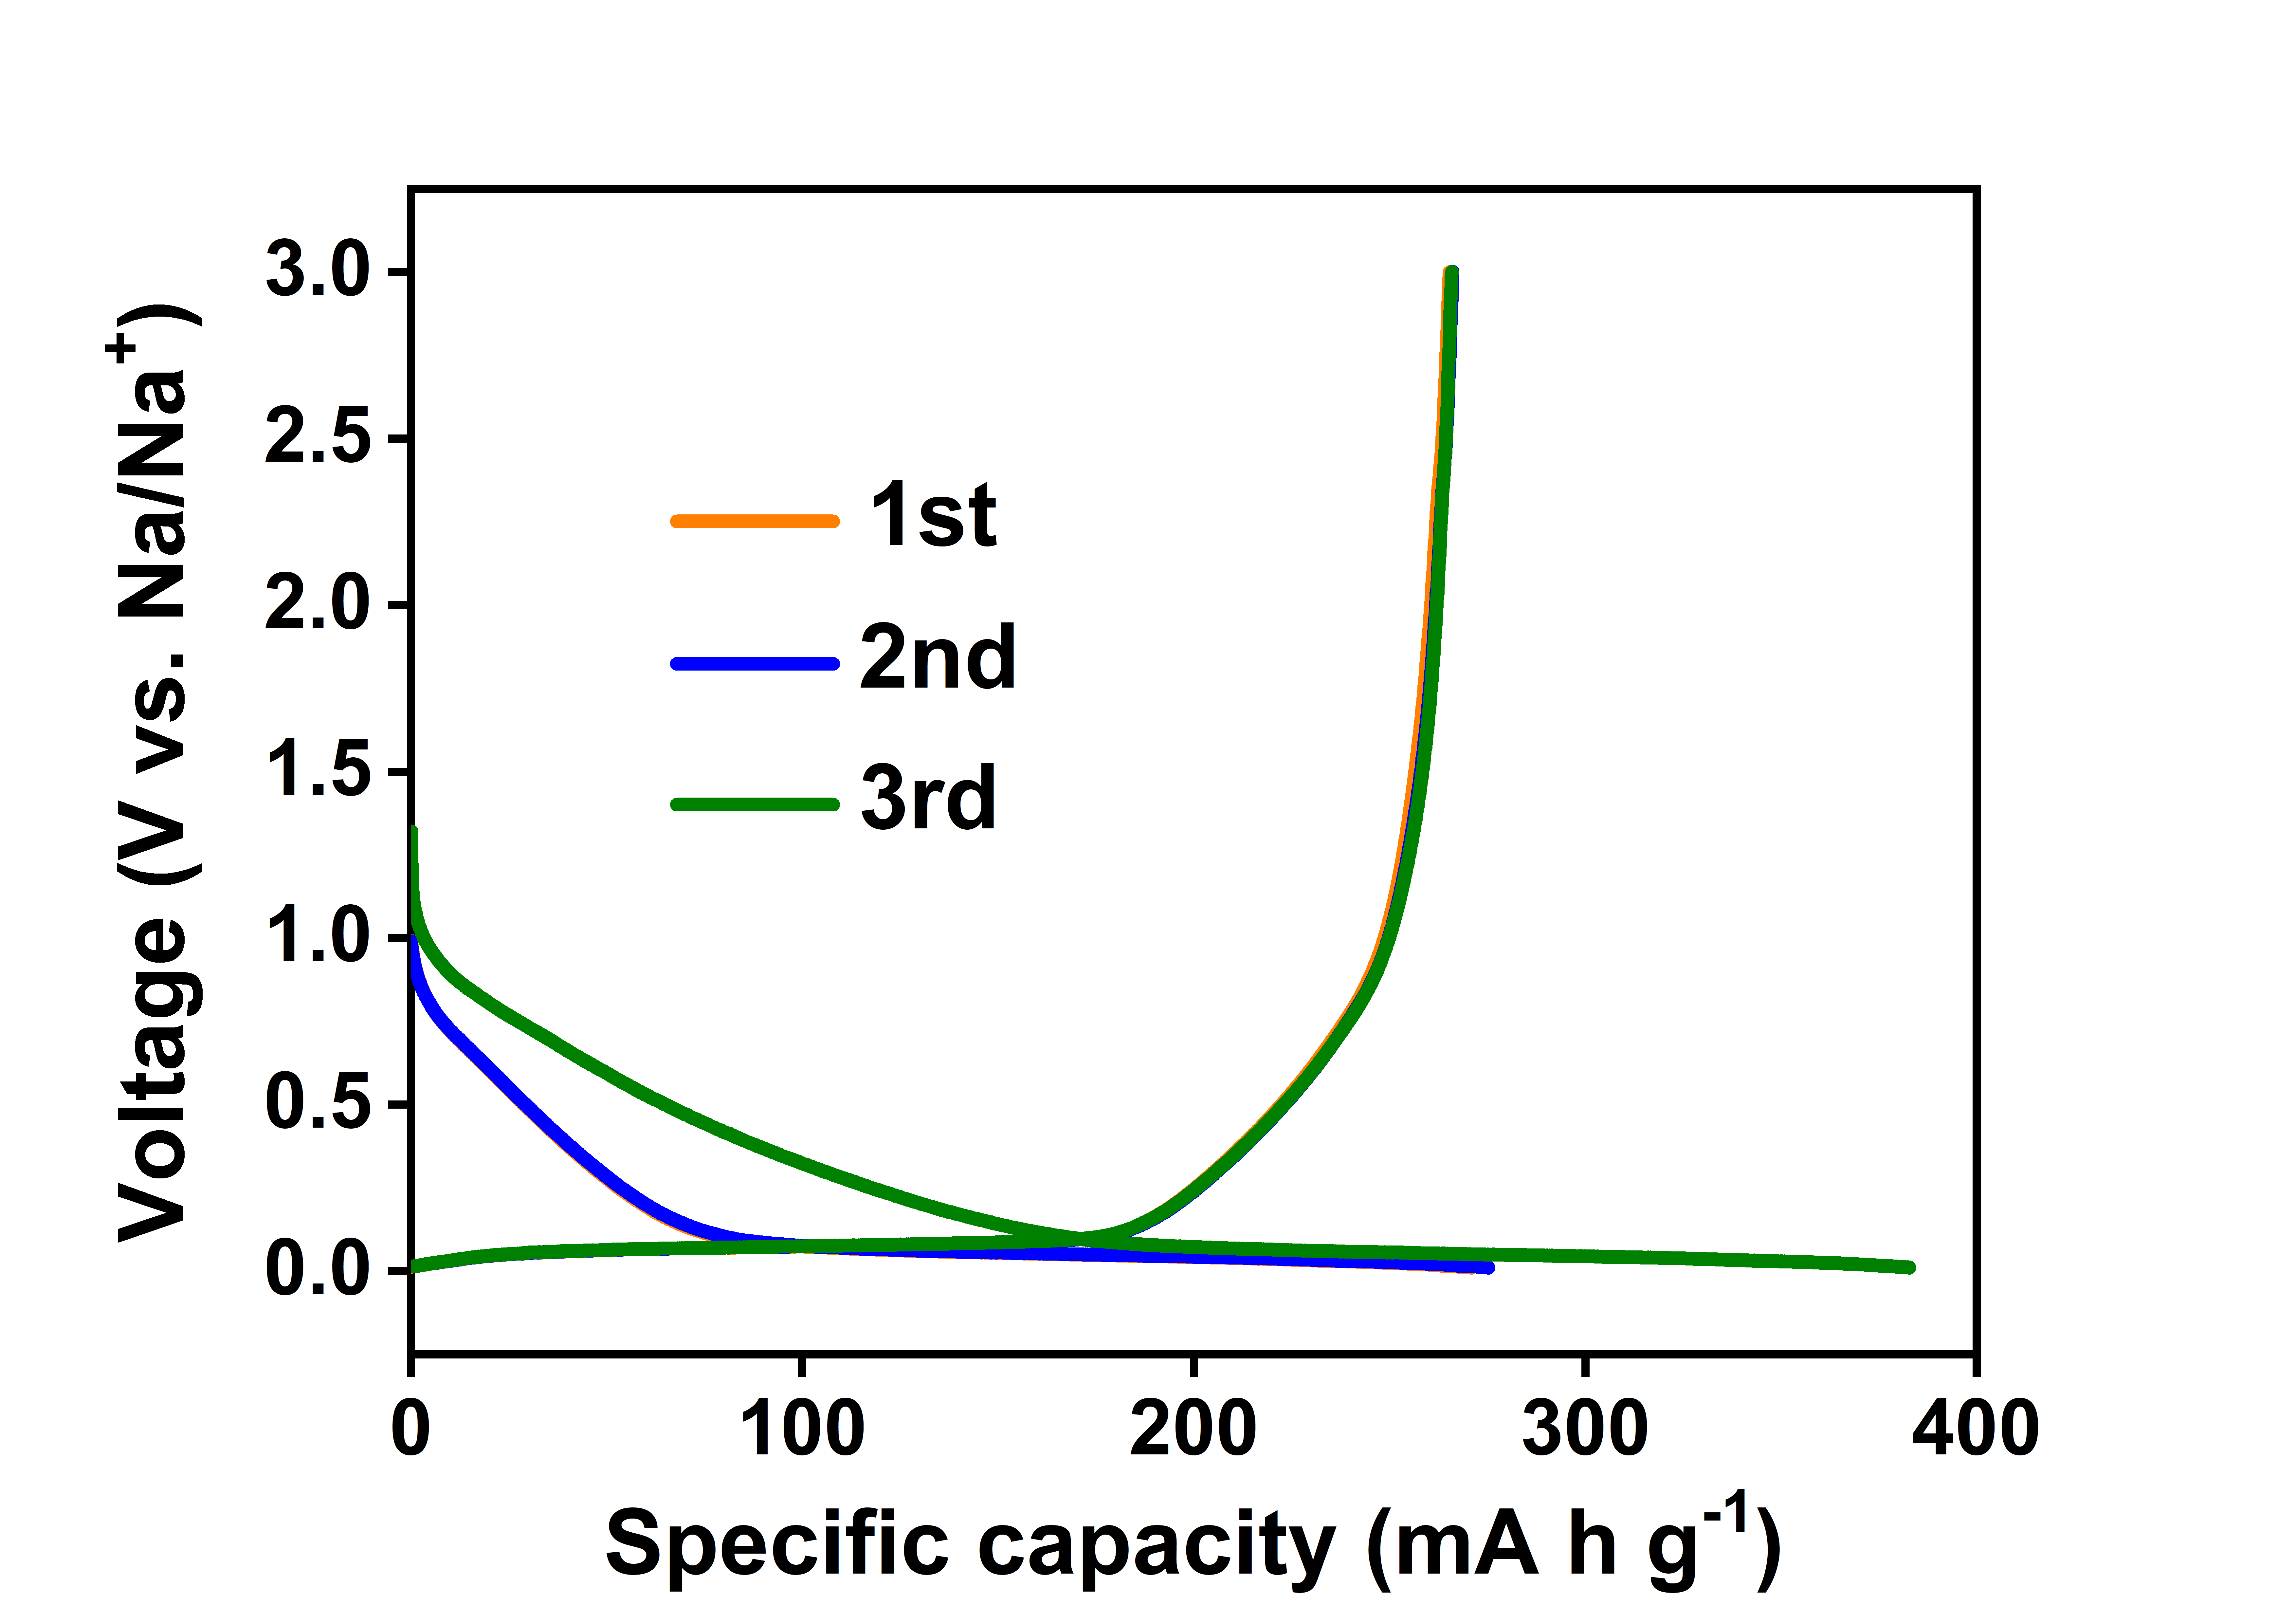


**Supplementary Fig. 18 Galvanostatic charge/discharge curves of the hard carbon electrode.**


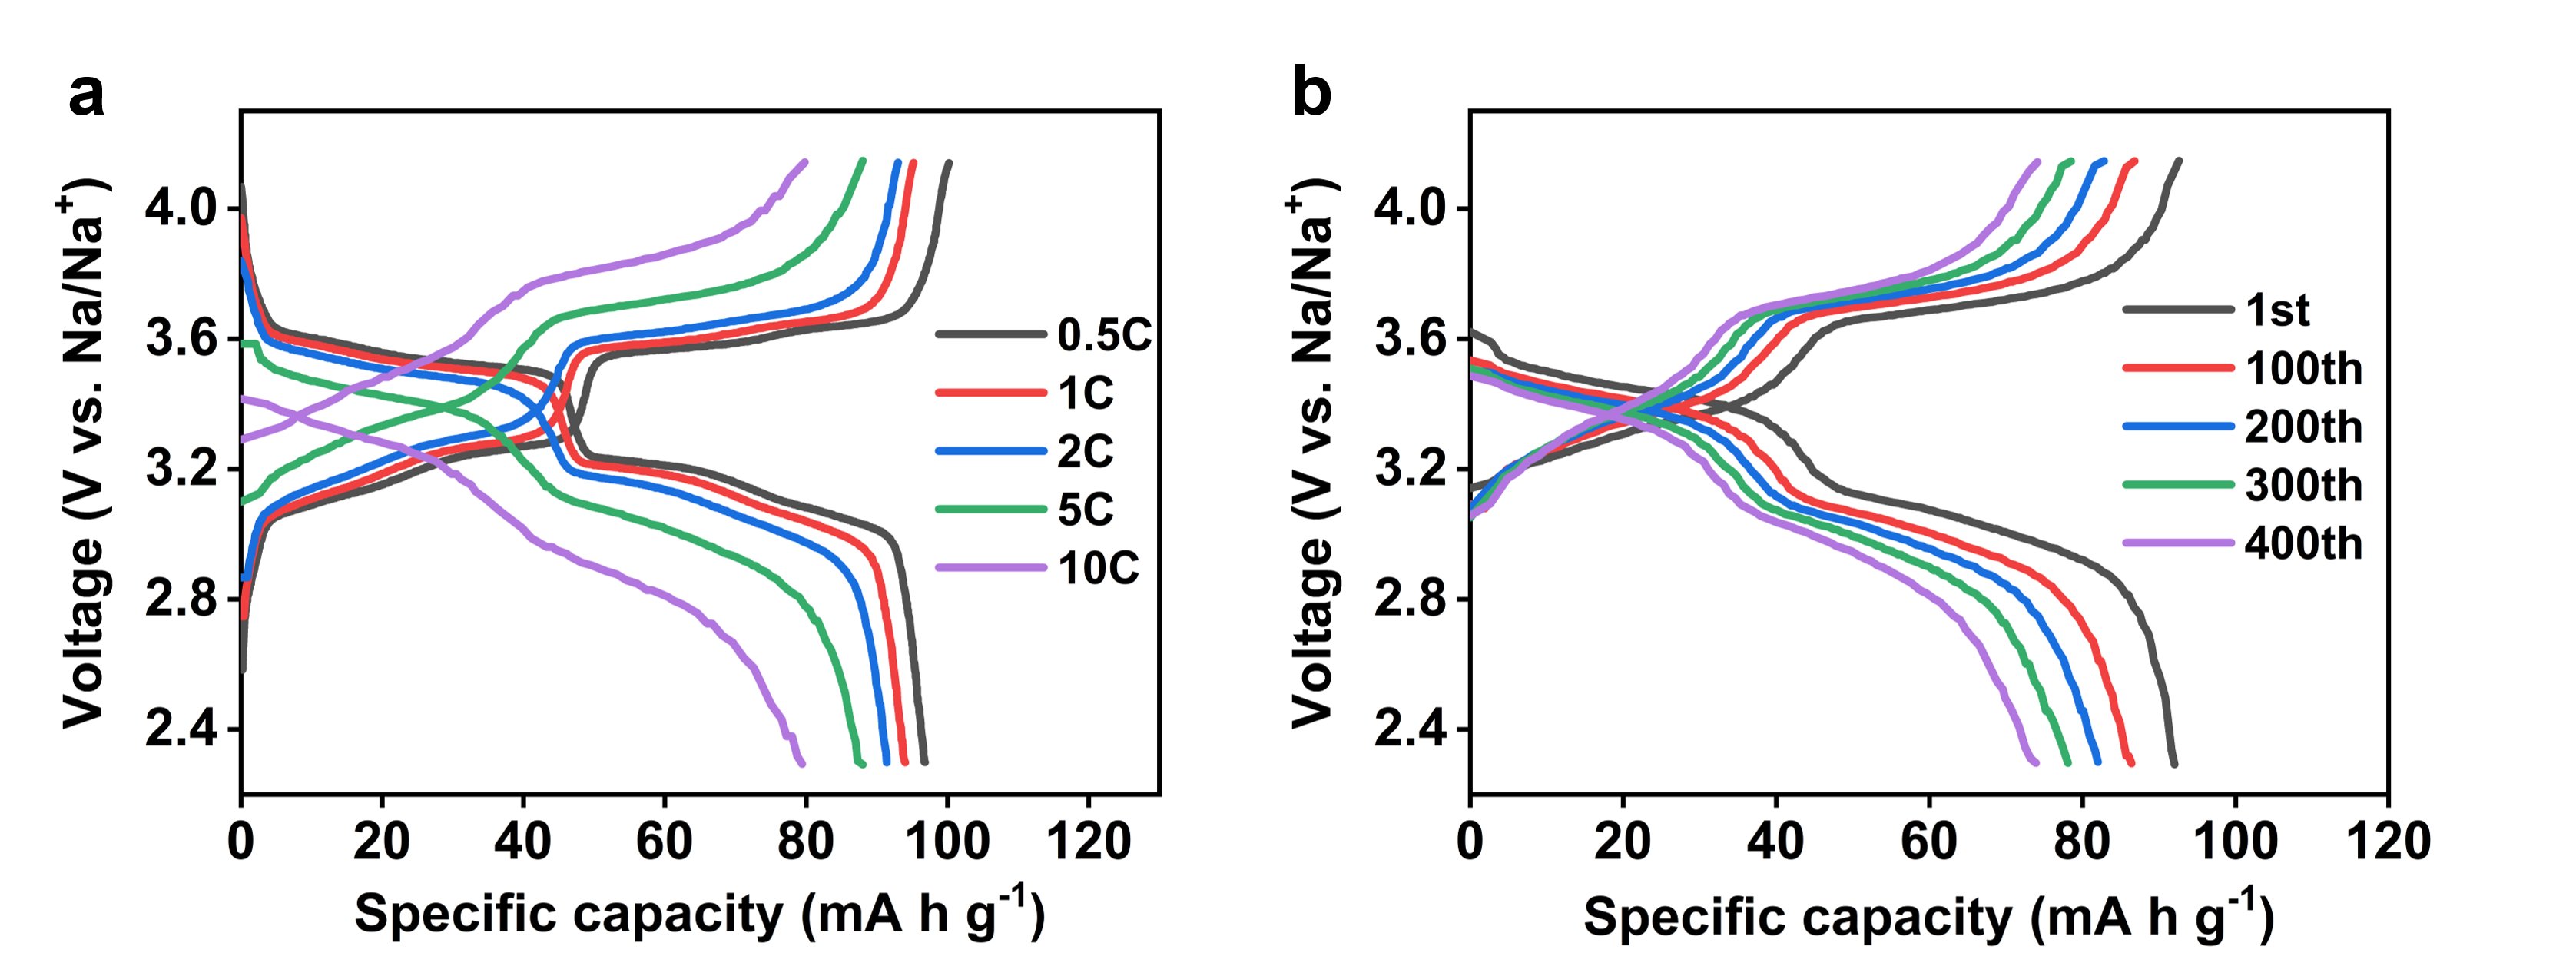


**Supplementary Fig. 19 a** **Galvanostatic charge/discharge curves of various rate of the full-cell at 25 °C. b Galvanostatic charge/discharge curves of various cycles numbers at 25 °C.**


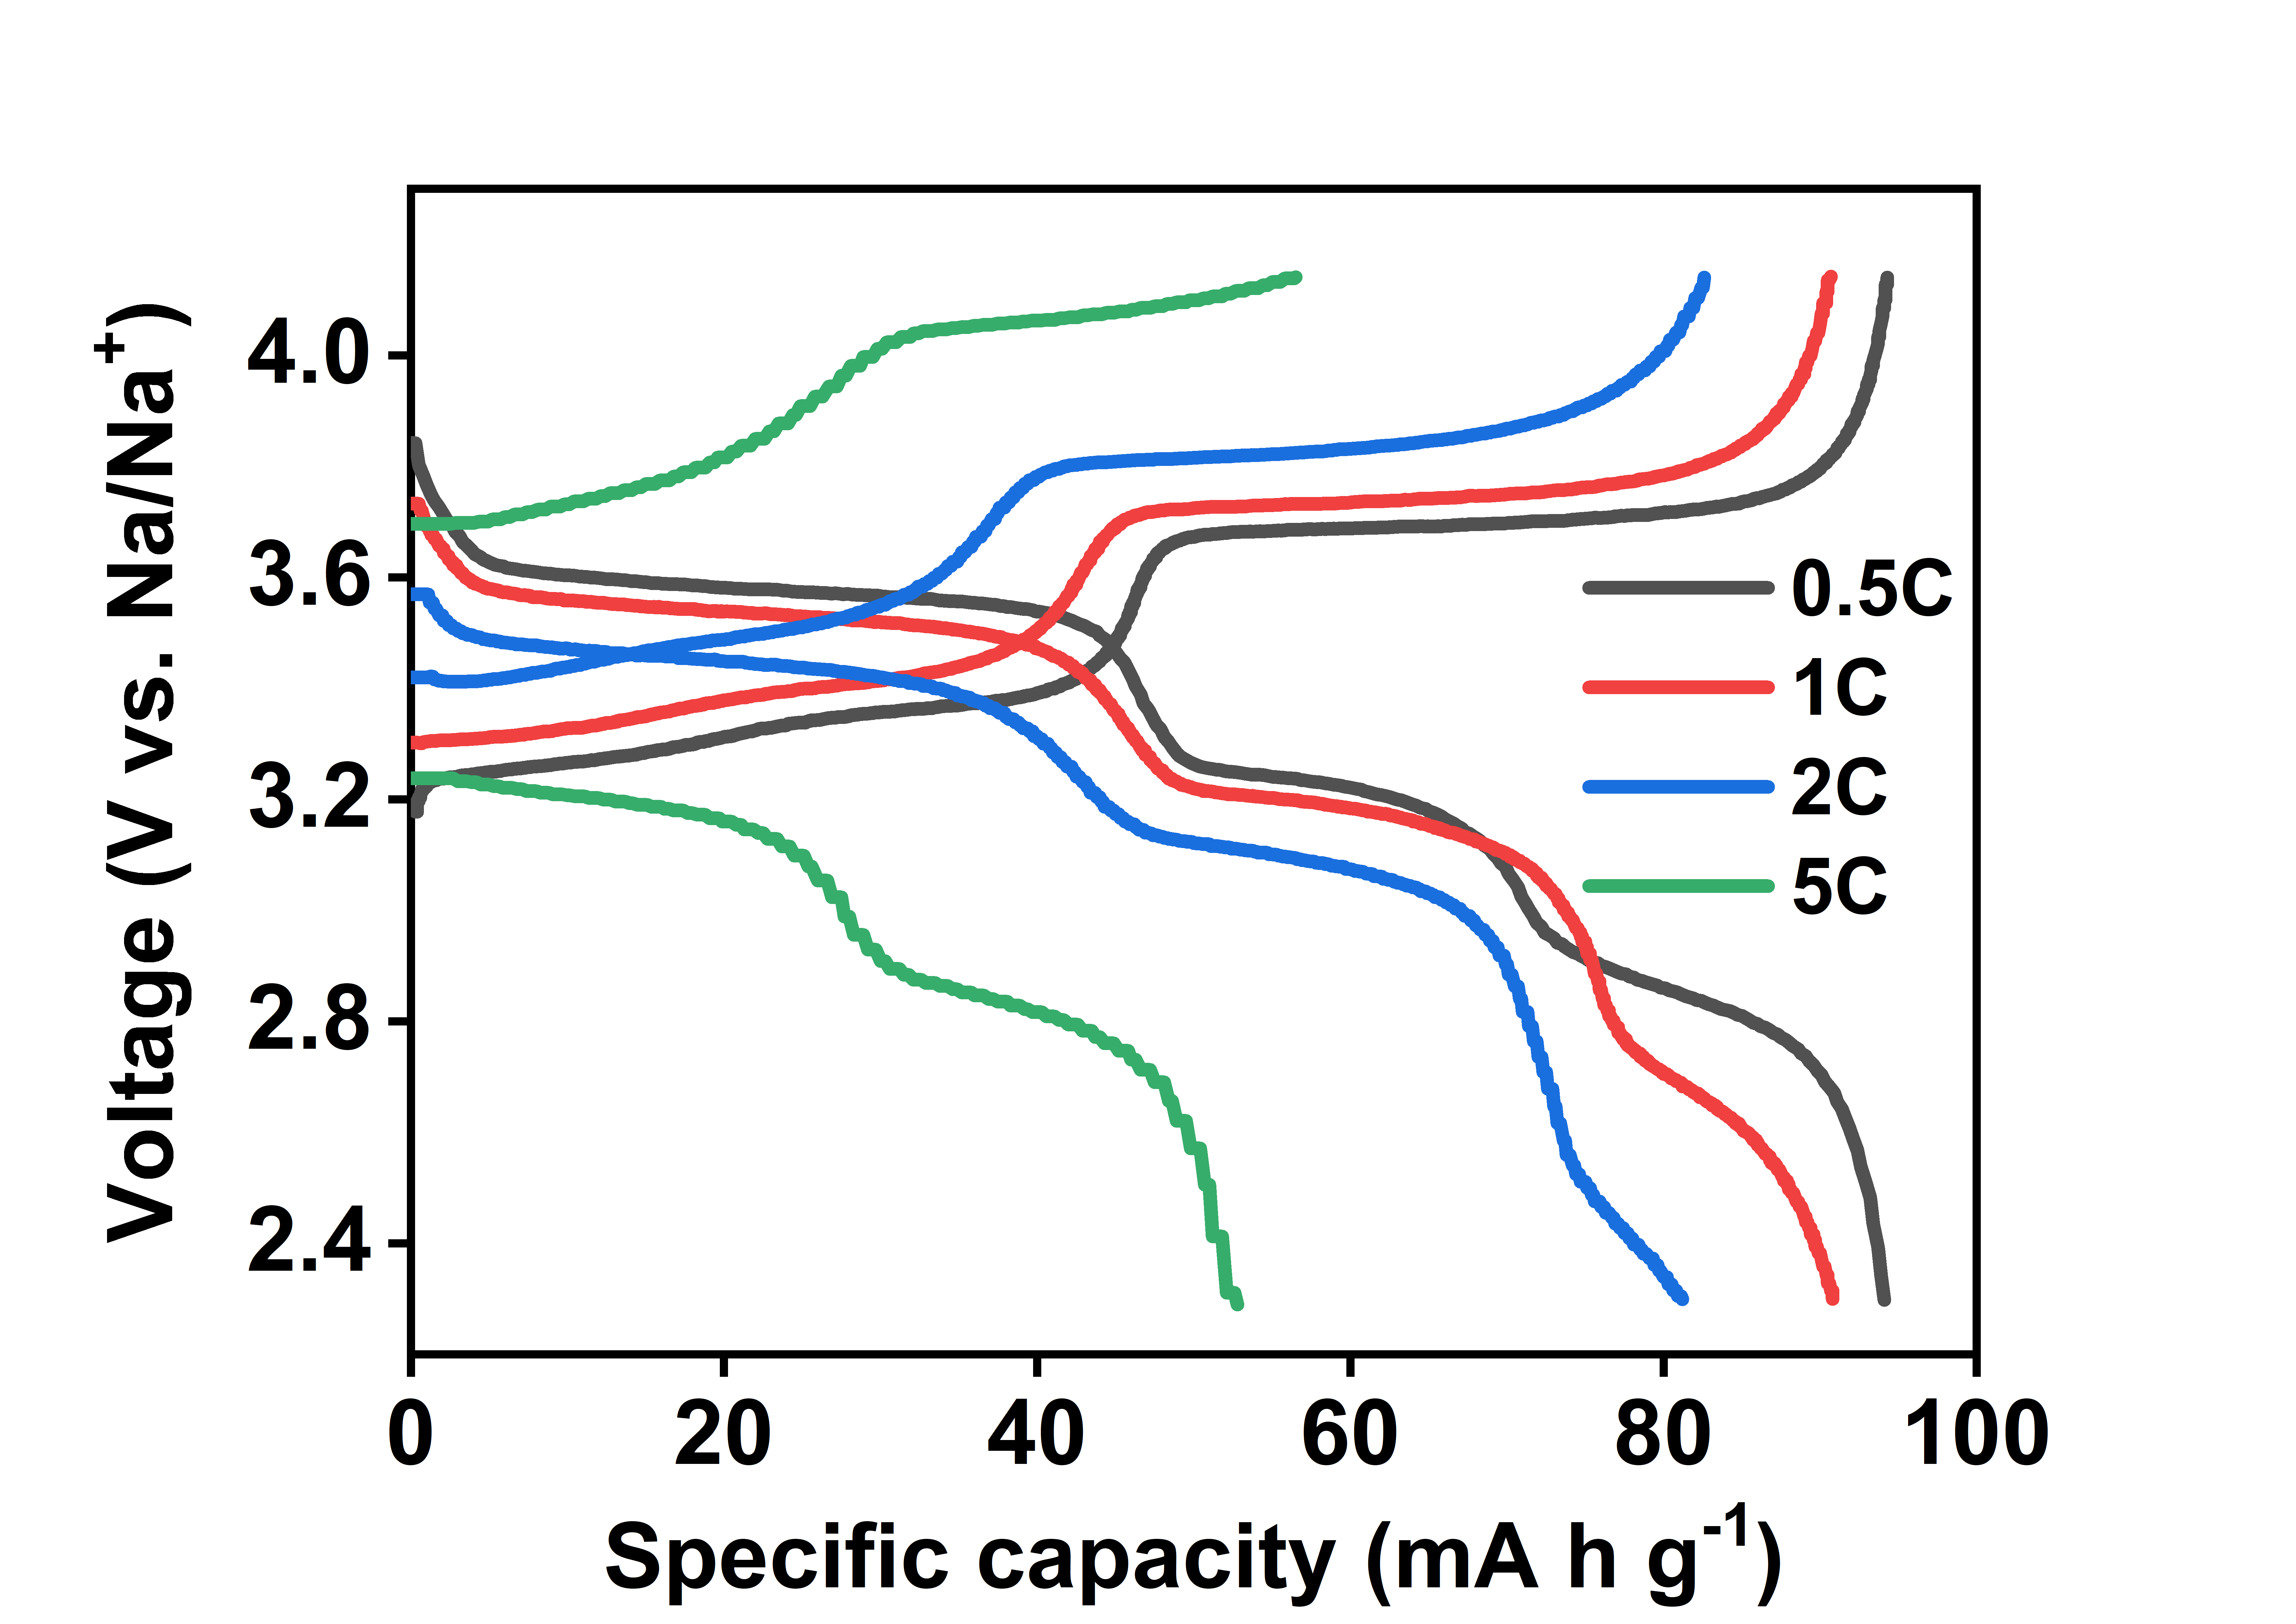


**Supplementary Fig. 20 Galvanostatic charge/discharge curves of various rate of the full-cell at -40 °C.**


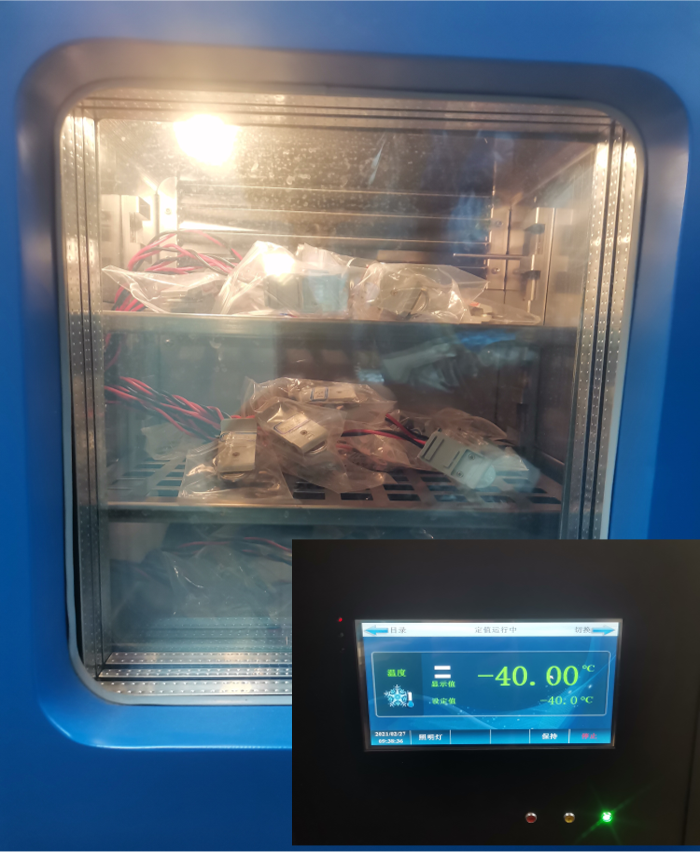


**Supplementary Fig. 21 The image of the low temperature electrochemical test for half and full cell at -40 °C.**

**Supplementary Table 1. Stoichiometry from the inductively coupled plasma atomic emission spectrometry (ICP-AES) analysis.**

|  | Na | Mn | Ni | Nb |
| --- | --- | --- | --- | --- |
| Na0.78Mn0.67Ni0.31Nb0.02O2 | 0.78 | 0.67 | 0.31 | 0.02 |

**Supplementary Table 2. Crystallographic parameters of P2-NaMNNb refined by the Rietveld method.**

| site | x | y | z | Occ. |
| --- | --- | --- | --- | --- |
| Naf | 0 | 0 | 1/4 | 0.237 |
| Nae | 2/3 | 1/3 | 3/4 | 0.543 |
| Mn | 0 | 0 | 0 | 0.670 |
| Ni | 0 | 0 | 0 | 0.310 |
| Nb | 0 | 0 | 0 | 0.02 |
| O | 2/3 | 1/3 | 0.07520 | 1 |
| a= 2.888(2)Å | c= 11.155(4)Å | V=80.56(2)Å3 | Rp= 2.36% | Rwp= 4.19% |

**Supplementary Table 3. Crystallographic parameters of P2-NaMN refined by the Rietveld method.**

| site | x | y | z | Occ. |
| --- | --- | --- | --- | --- |
| Naf | 0 | 0 | 1/4 | 0.303 |
| Nae | 2/3 | 1/3 | 3/4 | 0.477 |
| Mn | 0 | 0 | 0 | 0.68 |
| Ni | 0 | 0 | 0 | 0.32 |
| O | 2/3 | 1/3 | 0.07239 | 1 |
| a= 2.887(1)Å | c= 11.148(2)Å | V=80.46(1)Å3 | Rp= 3.17% | Rwp= 5.61% |

**Supplementary Table 4. Comparison of low-temperature performance of various cathode materials for sodium ion batteries.**

|  | **Cathode** | **Electrolyte** | **Anode** | **Operating temperature** | **Capacity retention (vs.25 °C)** | | **Ref.** |
| --- | --- | --- | --- | --- | --- | --- | --- |
|  | NVP-CNTs | NaPF6/G2 | Bi | -15 °C | 84.3% | 3 | |
|  | NVPOF | NaClO4 in  EC/PC+5% FEC | 3DSG | -25 °C | 60.7% | 4 | |
|  | NVPF-NTP | NaClO4 in  EC/PC+5% FEC | Na | -25 °C | 76.4% | 5 | |
|  | NVPC | Na[FSA]-[C2C1im][FSA] +0.2Na[FSA] | Na | -20 °C | 57.1% | 6 | |
| **polyanion**  **materials** | NGO@ Na3V(PO3)3N | NaClO4 in  EC/PC+5% FEC | Na | -15 °C | 75% | 7 | |
|  | Na4Fe3(PO4)2(P2O7) | NaClO4 in  EC/PC+5% FEC | Na | -20 °C | 87.7% | 8 | |
|  | Na4MnCr(PO4)3 | NaClO4 in PC with 5 % and 10 % FEC | Hard carbon | -10 °C | 79% | 9 | |
|  | NVP@3D hierarchical porous architectures | NaClO4 in EC/PC (1:1) +5% FEC | Na | -20 °C | 93% | 10 | |
|  | Na3Fe2(PO4)3@flake-porous | NaClO4 in EC/DMC | Hard carbon | -20 °C | 48.3% | 11 | |
|  | Mo-doped Na3V2(PO4)3 nanowires | NaClO4 in EC/DMC+5% FEC | Hard carbon | -15 °C | 95.9% | 12 | |
|  | NVP@C | NaClO4 in EC/PC | Na | -30 °C | 88% | 13 | |
| **Prussian blue material** | PB/CNT | NaClO4 in EC/PC | Na | -25 °C | 85% | 14 | |
| **Layered oxide material** | RAHC  Na[Ni0.60Co0.05Mn0.35]O2 | NaPF6 in  EMS (98%) and FEC (2%) | Hard carbon | -20 °C | 79.7%  (vs 30°C) | 15 | |
|  | Na2/3Ni1/3Mn7/12Fe1/12O2 | NaClO4 in PC+5% FEC | Na | -25 °C | 63% | 16 | |
|  | NCM@NTP7 | NaPF6 in a EC/DEC(11 v/v) | Na | -20 °C | 80.5% | 17 | |
|  | Na0.67Ni0.2Co0.2Mn0.6O2 | NaPF6 in diglyme | Na | -40 °C | 78.8% | 18 | |
|  | P2-NaMNNb | NaPF6 in diglyme | Na | -40 °C | 98% | Our work | |
| Hard carbon | 97.2% |

**Reference**

1. Liu, Z., et al. Ultralow Volume Change of P2-type Layered Oxide Cathode with Controlled Phase Transition by Regulating Distribution of Na+. *Angew. Chem. Int. Ed.* **n/a,**

2. Ma, C., et al. Exploring Oxygen Activity in the High Energy P2-Type Na0.78Ni0.23Mn0.69O2 Cathode Material for Na-Ion Batteries. *J. Am. Chem. Soc.* **139,** 4835-4845 (2017).

3. Wang, C., Du, D., Song, M., Wang, Y. &Li, F. A High-Power Na3V2(PO4)3-Bi Sodium-Ion Full Battery in a Wide Temperature Range. *Adv. Energy Mater.* **9,** 1900022 (2019).

4. Wang, Y.-Y., et al. An Ultralong Lifespan and Low-Temperature Workable Sodium-Ion Full Battery for Stationary Energy Storage. *Adv. Energy Mater.* **8,** 1703252 (2018).

5. Guo, J.-Z., et al. High-Energy/Power and Low-Temperature Cathode for Sodium-Ion Batteries: In Situ XRD Study and Superior Full-Cell Performance. *Adv. Mater.* **29,** 1701968 (2017).

6. Hwang, J., Matsumoto, K. &Hagiwara, R. Na3V2(PO4)3/C Positive Electrodes with High Energy and Power Densities for Sodium Secondary Batteries with Ionic Liquid Electrolytes That Operate across Wide Temperature Ranges. *Advanced Sustainable Systems* **2,** 1700171 (2018).

7. Chen, M., et al. Development and Investigation of a NASICON-Type High-Voltage Cathode Material for High-Power Sodium-Ion Batteries. *Angew. Chem. Int. Ed.* **59,** 2449-2456 (2020).

8. Chen, M., et al. NASICON-type air-stable and all-climate cathode for sodium-ion batteries with low cost and high-power density. *Nat. Commun.* **10,** 1480 (2019).

9. Zhang, J., et al. A Novel NASICON-Type Na4MnCr(PO4)3 Demonstrating the Energy Density Record of Phosphate Cathodes for Sodium-Ion Batteries. *Adv. Mater.* **32,** 1906348 (2020).

10. Rui, X., et al. A Low-Temperature Sodium-Ion Full Battery: Superb Kinetics and Cycling Stability. *Adv. Funct. Mater.* **31,** 2009458 (2021).

11. Cao, Y., et al. Highly Stable Na3Fe2(PO4)3@Hard Carbon Sodium-Ion Full Cell for Low-Cost Energy Storage. *ACS Sustainable Chemistry & Engineering* **8,** 1380-1387 (2020).

12. Liang, L., et al. Construction and Operating Mechanism of High-Rate Mo-Doped Na3V2(PO4)3@C Nanowires toward Practicable Wide-Temperature-Tolerance Na-Ion and Hybrid Li/Na-Ion Batteries. *Adv. Energy Mater.* **n/a,** 2100287

13. Liu, T., et al. All-climate sodium ion batteries based on the NASICON electrode materials. *Nano Energy* **30,** 756-761 (2016).

14. You, Y., et al. Subzero-Temperature Cathode for a Sodium-Ion Battery. *Adv. Mater.* **28,** 7243-7248 (2016).

15. Hwang, J.-Y., et al. Radially aligned hierarchical columnar structure as a cathode material for high energy density sodium-ion batteries. *Nat. Commun.* **6,** 6865 (2015).

16. Yang, Q., et al. Advanced P2-Na2/3Ni1/3Mn7/12Fe1/12O2 Cathode Material with Suppressed P2–O2 Phase Transition toward High-Performance Sodium-Ion Battery. *Acs Appl. Mater. Inter* **10,** 34272-34282 (2018).

17. Li, Y., et al. Construction nasicon-type NaTi2(PO4)3 nanoshell on the surface of P2-type Na0.67Co0.2Mn0.8O2 cathode for superior room/low-temperature sodium storage. *Chem. Eng. J.* **402,** 126181 (2020).

18. Wang, X., et al. Rational design of Na0.67Ni0.2Co0.2Mn0.6O2 microsphere cathode material for stable and low temperature sodium ion storage. *Chem. Eng. J.* **428,** 130990 (2022).
